# Supplementary material for: High Throughput Approaches to Unravel the Mechanism of Action of a New Vanadium-Based Compound against Trypanosoma cruzi
Source: Bioinorg Chem Appl. 2020 Apr 11;2020:1634270. doi: 10.1155/2020/1634270 (PMC7171612; doi:10.1155/2020/1634270)
Supplement: Supplementary Materials — Figure S1: validation of transcriptomic data of selected genes with qRT-PCR. The expression of random selected modified transcripts from transcriptome data list was analyzed by qRT-PCR comparing untreated and treated parasites, and expression values (log2 FC RT-PCR) were plotted against transcriptomic data (log2 FC transcriptomic). Figure S2: determination of differentially abundant proteins in T. cruzi epimastigotes treated with VIVO(5Brsal)(aminophen). Soluble (A) and insoluble (B) proteins from untreated (control) and treated parasites were analyzed. The figure shows a Volcano plot generated with the T-Fold module from PatternLab for Proteomics. Proteins detected in at least 4 replicates of all conditions were indicated as individual dots and plotted accordingly to the p value (log2 (p value)) and fold change (log2 (fold change)). Black dots represent proteins that do not satisfy neither the fold change nor the statistics criteria for differential expression and thus are considered unchanged between conditions. Dark gray represents proteins that do satisfy the fold change but not the statistic criteria for differential expression. Light gray dots represent low abundant proteins satisfying both fold change and q value criteria for differential expression but not considered for further analysis due to the low number of spectral counts. Finally, white dots correspond to proteins satisfying all statistical filters and represent the differentially expressed proteins between strains. For details about proteins corresponding to white dots, see supplemental Table S3. Table S1: row data stats from transcriptome analysis of control untreated parasites and VIVO(5Brsal)(aminophen) treated parasites. Table S2: list of differentially expressed genes from transcriptome analysis. The upregulated and downregulated transcripts in VIVO(5Brsal)(aminophen) treated parasites with respect to control untreated parasites are shown. Table S3: list of differentially expressed proteins from [file 1634270.f1.zip › 1634270.f1/S2_File.xlsx]

## Sheet: Regulated genes
Up-regulated genes
Gene ID	Fold Change	log2 Fold Change	FDR	Product Description
TcCLB.507023.70	2.21954	1.15026	7.5693e-37	hypothetical protein, conserved
TcCLB.504037.10	1.58951	0.668582	5.00358e-07	hypothetical protein, conserved
TcCLB.508701.20	1.4926	0.577825	1.14513e-08	cation transporter, putative
TcCLB.511481.55	1.46493	0.550827	0.000117556	RNA-binding protein, putative
TcCLB.508153.1074	1.3444	0.426958	0.00476534	hypothetical protein, conserved
TcCLB.506989.30	1.32868	0.409992	0.000142729	ABC transporter, putative
TcCLB.507665.30	1.27604	0.351675	0.00158327	ferric reductase transmembrane protein, putative
Down-regulated genes
Gene ID	Fold Change	log2 Fold Change	FDR	Product Description
TcCLB.511277.390	0.519221	-0.94558	1.15108e-19	hypothetical protein, conserved
TcCLB.506629.40	0.596841	-0.744582	3.59797e-11	hypothetical protein, conserved
TcCLB.509063.30	0.62041	-0.688705	1.07706e-10	chaperonin HSP60/CNP60, putative
TcCLB.504045.20	0.620681	-0.688076	4.18745e-10	hypothetical protein, conserved
TcCLB.506443.70	0.62257	-0.683692	8.94047e-14	glutathione-S-transferase/glutaredoxin, putative
TcCLB.507057.10	0.641284	-0.640965	1.77557e-06	hypothetical protein, conserved
TcCLB.509991.20	0.654963	-0.610514	5.03103e-09	conserved protein, unknown function
TcCLB.510659.180	0.657922	-0.604012	1.38214e-06	hypothetical protein, conserved
TcCLB.508641.200	0.671589	-0.574349	3.76401e-08	hypothetical protein, conserved
TcCLB.506629.30	0.673325	-0.570626	6.7671e-08	guide RNA-binding protein of 21 kDa
TcCLB.508737.30	0.673744	-0.569727	4.36078e-08	kinetoplast polyadenylation/uridylation factor 1
TcCLB.506321.280	0.680422	-0.555498	1.21254e-10	hypothetical protein, conserved
TcCLB.509161.149	0.681518	-0.553175	2.31781e-06	hypothetical protein, conserved
TcCLB.510575.200	0.686639	-0.542377	9.85204e-08	chaperone DNAJ protein, putative
TcCLB.508153.1090	0.68855	-0.538367	4.67792e-05	hypothetical protein, conserved
TcCLB.503603.20	0.69189	-0.531385	1.81299e-06	hypothetical protein, conserved
TcCLB.507053.170	0.692931	-0.529216	1.30051e-05	hypothetical protein, conserved
TcCLB.511643.10	0.701421	-0.511648	6.09795e-06	hypothetical protein, conserved
TcCLB.503733.70	0.701778	-0.510913	6.45979e-06	phosphoacetylglucosamine mutase, putative
TcCLB.510421.270	0.7019	-0.510663	0.000929158	hypothetical protein, conserved
TcCLB.467287.30	0.702541	-0.509345	1.77557e-06	ATPase beta subunit, putative
TcCLB.508901.10	0.703211	-0.50797	0.000258545	hypothetical protein, conserved
TcCLB.508881.54	0.705517	-0.503248	0.000117158	hypothetical protein, conserved
TcCLB.510121.40	0.707884	-0.498415	0.00085694	hypothetical protein
TcCLB.509937.210	0.708095	-0.497984	3.35923e-06	hypothetical protein, conserved
TcCLB.511261.30	0.70921	-0.495715	0.000144521	NADH-ubiquinone oxidoreductase complex I subunit, putative
TcCLB.511151.90	0.710727	-0.492632	6.42194e-08	glycerol-3-phosphate dehydrogenase, putative
TcCLB.508601.10	0.711941	-0.49017	0.0025635	mitochondrial DEAD box protein, putative
TcCLB.509935.20	0.713723	-0.486564	3.74413e-06	hypothetical protein, conserved
TcCLB.507053.40	0.715776	-0.48242	9.5935e-06	hypothetical protein, conserved
TcCLB.506247.210	0.716623	-0.480714	2.55997e-08	hypothetical protein, conserved
TcCLB.510395.10	0.717485	-0.47898	6.0496e-08	ATP synthase F1, alpha subunit, putative
TcCLB.511323.50	0.719689	-0.474554	0.00143123	NADH-ubiquinone oxidoreductase, mitochondrial, putative
TcCLB.511907.70	0.719977	-0.473977	0.00085619	short chain dehydrogenase/reductase, putative
TcCLB.506295.70	0.720927	-0.472075	4.48224e-06	hypothetical protein, conserved
TcCLB.510577.40	0.721348	-0.471232	0.00166219	hypothetical protein, conserved
TcCLB.510895.29	0.725359	-0.463232	0.00875093	hypothetical protein, conserved
TcCLB.510903.60	0.727948	-0.458093	0.000358024	prenyltransferase, putative
TcCLB.506855.120	0.728803	-0.4564	0.000841884	hypothetical protein, conserved
TcCLB.510421.320	0.730135	-0.453764	0.000140545	pyruvate dehydrogenase E1 beta subunit, putative
TcCLB.511237.110	0.730247	-0.453544	0.00184777	cyclophilin, putative
TcCLB.510003.20	0.734888	-0.444404	3.94501e-05	hypothetical protein, conserved
TcCLB.510007.70	0.734943	-0.444296	0.0013732	ATP-dependent zinc metallopeptidase, putative
TcCLB.507513.50	0.735001	-0.444182	0.000880886	heat shock 70 kDa protein, putative
TcCLB.511239.140	0.735256	-0.443681	0.00253183	60S ribosomal protein, putative
TcCLB.503617.40	0.737071	-0.440125	1.62546e-07	ATP synthase F1, alpha subunit, putative (fragment)
TcCLB.506821.100	0.738689	-0.436961	0.00112066	mitochondrial RNA binding complex 1 subunit, putative
TcCLB.506629.220	0.741677	-0.431138	0.000247619	isovaleryl-coA dehydrogenase, putative
TcCLB.509215.40	0.745065	-0.424562	0.00011302	peptidyl-prolyl cis-trans isomerase, putative
TcCLB.507969.20	0.745934	-0.42288	0.00666065	hypothetical protein, conserved
TcCLB.510423.50	0.746426	-0.42193	0.00383168	hypothetical protein, conserved
TcCLB.510131.30	0.747165	-0.420502	5.64886e-05	hypothetical protein, conserved
TcCLB.509733.110	0.751632	-0.411902	5.85159e-05	hypothetical protein, conserved
TcCLB.503823.160	0.753074	-0.409136	0.00477477	ubiquinone biosynthesis methyltransferase, putative
TcCLB.511821.110	0.755676	-0.40416	0.0021501	translation initiation factor IF-2, putative
TcCLB.508397.40	0.756353	-0.402868	0.00496084	succinate dehydrogenase subunit
TcCLB.509229.80	0.757548	-0.40059	0.000107635	mitochondrial processing peptidase alpha subunit, putative
TcCLB.511899.40	0.75801	-0.399711	2.04373e-06	2-amino-3-ketobutyrate coenzyme A ligase, putative
TcCLB.506559.290	0.759901	-0.396117	0.00711675	hypothetical protein, conserved
TcCLB.509005.40	0.762841	-0.390545	0.00424885	hypothetical protein, conserved
TcCLB.506007.20	0.763315	-0.38965	0.0093604	RNA editing complex protein MP18, putative
TcCLB.432677.20	0.76444	-0.387526	0.000442976	heat shock 70 kDa protein, mitochondrial precursor, putative (fragment)
TcCLB.509053.70	0.766371	-0.383885	0.000930597	p22 protein precursor, putative
TcCLB.503935.20	0.769099	-0.378759	0.00085694	2-oxoglutarate dehydrogenase, E2 component, dihydrolipoamide succinyltransferase, putative
TcCLB.508503.20	0.769966	-0.377134	0.000121585	cytochrome c oxidase subunit V, putative
TcCLB.506851.20	0.772182	-0.372988	0.00228503	choline dehydrogenase, putative
TcCLB.507601.70	0.774359	-0.368925	0.00423174	dihydrolipoamide branched chain transacylase, putative
TcCLB.509937.20	0.775256	-0.367256	0.000115716	Bifunctional NAD(P)H-hydrate repair enzyme
TcCLB.505071.110	0.776804	-0.364377	0.00666065	hypothetical protein, conserved
TcCLB.511909.40	0.780937	-0.356721	0.000174324	Succinate dehydrogenase [ubiquinone] flavoprotein subunit, mitochondrial
TcCLB.509039.10	0.78161	-0.355479	0.00496237	hypothetical protein, conserved
TcCLB.511899.10	0.783297	-0.352369	0.00300729	2-amino-3-ketobutyrate coenzyme A ligase, putative
TcCLB.507029.30	0.789599	-0.340808	0.00014526	heat shock 70 kDa protein, mitochondrial precursor, putative
TcCLB.508173.100	0.789701	-0.340622	0.00618072	Monooxygenase, putative
TcCLB.506999.90	0.789853	-0.340345	0.00733245	rieske iron-sulfur protein, mitochondrial precursor, putative
TcCLB.503769.40	0.796462	-0.328323	0.000930597	cytochrome oxidase subunit VII
TcCLB.507723.100	0.799532	-0.322773	0.00472071	cytochrome oxidase subunit IX, putative
TcCLB.508319.30	0.801565	-0.319108	0.00853072	hypothetical protein, conserved
TcCLB.511515.40	0.804697	-0.313482	0.00496084	heat shock 70 kDa protein, mitochondrial precursor, putative
TcCLB.511903.40	0.819047	-0.287982	0.00383168	3-hydroxy-3-methylglutaryl-CoA synthase, putative
