# Supplementary material for: High Throughput Approaches to Unravel the Mechanism of Action of a New Vanadium-Based Compound against Trypanosoma cruzi
Source: Bioinorg Chem Appl. 2020 Apr 11;2020:1634270. doi: 10.1155/2020/1634270 (PMC7171612; doi:10.1155/2020/1634270)
Supplement: Supplementary Materials — Figure S1: validation of transcriptomic data of selected genes with qRT-PCR. The expression of random selected modified transcripts from transcriptome data list was analyzed by qRT-PCR comparing untreated and treated parasites, and expression values (log2 FC RT-PCR) were plotted against transcriptomic data (log2 FC transcriptomic). Figure S2: determination of differentially abundant proteins in T. cruzi epimastigotes treated with VIVO(5Brsal)(aminophen). Soluble (A) and insoluble (B) proteins from untreated (control) and treated parasites were analyzed. The figure shows a Volcano plot generated with the T-Fold module from PatternLab for Proteomics. Proteins detected in at least 4 replicates of all conditions were indicated as individual dots and plotted accordingly to the p value (log2 (p value)) and fold change (log2 (fold change)). Black dots represent proteins that do not satisfy neither the fold change nor the statistics criteria for differential expression and thus are considered unchanged between conditions. Dark gray represents proteins that do satisfy the fold change but not the statistic criteria for differential expression. Light gray dots represent low abundant proteins satisfying both fold change and q value criteria for differential expression but not considered for further analysis due to the low number of spectral counts. Finally, white dots correspond to proteins satisfying all statistical filters and represent the differentially expressed proteins between strains. For details about proteins corresponding to white dots, see supplemental Table S3. Table S1: row data stats from transcriptome analysis of control untreated parasites and VIVO(5Brsal)(aminophen) treated parasites. Table S2: list of differentially expressed genes from transcriptome analysis. The upregulated and downregulated transcripts in VIVO(5Brsal)(aminophen) treated parasites with respect to control untreated parasites are shown. Table S3: list of differentially expressed proteins from [file 1634270.f1.zip › 1634270.f1/S3_File.xlsx]

## Sheet: SP over-represented
Soluble over-represented proteins
Uniprot ID	Replicate Count	Total Signal	Description
Q4E4P5	3	18	DNA-directed RNA polymerase subunit beta OS=Trypanosoma cruzi (strain CL Brener) GN=Tc00.1047053506925.40 PE=3 SV=1
Q4CYN5	2	16	Uncharacterized protein OS=Trypanosoma cruzi (strain CL Brener) GN=Tc00.1047053511231.60 PE=4 SV=1; Additional IDs concatenated into MaxParsimony group: Q4D101; Additional IDs concatenated into MaxParsimony group: Q4D101
Q4CNZ3	3	15	Uncharacterized protein OS=Trypanosoma cruzi (strain CL Brener) GN=Tc00.1047053507769.30 PE=4 SV=1
Q4DS87	3	10	Uncharacterized protein OS=Trypanosoma cruzi (strain CL Brener) GN=Tc00.1047053510759.70 PE=4 SV=1; Additional IDs concatenated into MaxParsimony group: Q4DP29
Q4E5G2	3	9	Uncharacterized protein OS=Trypanosoma cruzi (strain CL Brener) GN=Tc00.1047053511277.320 PE=4 SV=1
Q4D4R1	2	9	Uncharacterized protein OS=Trypanosoma cruzi (strain CL Brener) GN=Tc00.1047053506511.20 PE=4 SV=1
Q4DII7	2	9	Uncharacterized protein OS=Trypanosoma cruzi (strain CL Brener) GN=Tc00.1047053509799.140 PE=4 SV=1; Additional IDs concatenated into MaxParsimony group: Q4CVQ1
Q4DSL4	2	9	Uncharacterized protein OS=Trypanosoma cruzi (strain CL Brener) GN=Tc00.1047053511303.34 PE=4 SV=1; Additional IDs concatenated into MaxParsimony group: Q4DQ03; Additional IDs concatenated into MaxParsimony group: Q4DQ03
Q4CNU0	2	7	Lysosomal/endosomal membrane protein p67, putative OS=Trypanosoma cruzi (strain CL Brener) GN=Tc00.1047053510825.30 PE=4 SV=1
Q4D4J6	2	7	Rab11B GTPase, putative OS=Trypanosoma cruzi (strain CL Brener) GN=Tc00.1047053508445.10 PE=4 SV=1
Q4DI16	2	7	Uncharacterized protein OS=Trypanosoma cruzi (strain CL Brener) GN=Tc00.1047053509229.110 PE=4 SV=1; Additional IDs concatenated into MaxParsimony group: Q4DIG9; Additional IDs concatenated into MaxParsimony group: Q4DIG9
Q4DDL2	3	6	DNA-directed RNA polymerase, alpha subunit, putative OS=Trypanosoma cruzi (strain CL Brener) GN=Tc00.1047053511293.30 PE=4 SV=1; Additional IDs concatenated into MaxParsimony group: Q4DRD4
Q4E0C6	3	6	Pyruvate dehydrogenase (Lipoamide) kinase, putative OS=Trypanosoma cruzi (strain CL Brener) GN=Tc00.1047053509875.170 PE=4 SV=1
Q4DUC2	2	6	Ribosomal RNA processing protein 40, putative OS=Trypanosoma cruzi (strain CL Brener) GN=Tc00.1047053506625.200 PE=4 SV=1
Q4D511	2	6	Eukaryotic translation initiation factor eIF-4E, putative OS=Trypanosoma cruzi (strain CL Brener) GN=Tc00.1047053503593.10 PE=3 SV=1; Additional IDs concatenated into MaxParsimony group: Q4DP83; Additional IDs concatenated into MaxParsimony group: Q4DP83
Q4E5A8	2	6	Uncharacterized protein OS=Trypanosoma cruzi (strain CL Brener) GN=Tc00.1047053506559.220 PE=4 SV=1; Additional IDs concatenated into MaxParsimony group: Q4CSI6; Additional IDs concatenated into MaxParsimony group: Q4CSI6
Q4DZV8	2	6	Uncharacterized protein OS=Trypanosoma cruzi (strain CL Brener) GN=Tc00.1047053506789.310 PE=4 SV=1
Q4DYJ6	2	5	Protein kinase, putative OS=Trypanosoma cruzi (strain CL Brener) GN=Tc00.1047053506211.220 PE=4 SV=1
Q4DXJ6	2	5	Deoxyhypusine synthase, putative OS=Trypanosoma cruzi (strain CL Brener) GN=Tc00.1047053506195.300 PE=4 SV=1
Q4DMH1	2	4	Uncharacterized protein OS=Trypanosoma cruzi (strain CL Brener) GN=Tc00.1047053508881.140 PE=4 SV=1; Additional IDs concatenated into MaxParsimony group: Q4DIX2; Additional IDs concatenated into MaxParsimony group: Q4DIX2
Q4CW19	2	4	Uncharacterized protein OS=Trypanosoma cruzi (strain CL Brener) GN=Tc00.1047053511067.14 PE=3 SV=1; Additional IDs concatenated into MaxParsimony group: Q4DU80; Additional IDs concatenated into MaxParsimony group: Q4DU80
Q4D3P2	2	4	Calmodulin, putative OS=Trypanosoma cruzi (strain CL Brener) GN=Tc00.1047053508951.50 PE=4 SV=1; Additional IDs concatenated into MaxParsimony group: Q4DQ24; Additional IDs concatenated into MaxParsimony group: Q4DQ24
Q4CWZ2	2	4	Uncharacterized protein OS=Trypanosoma cruzi (strain CL Brener) GN=Tc00.1047053507057.20 PE=3 SV=1; Additional IDs concatenated into MaxParsimony group: Q4DA22
Q4DC26	2	4	Uncharacterized protein OS=Trypanosoma cruzi (strain CL Brener) GN=Tc00.1047053506213.40 PE=4 SV=1; Additional IDs concatenated into MaxParsimony group: Q4DJ06; Additional IDs concatenated into MaxParsimony group: Q4DJ06
Q4CMH4	3	3	Uncharacterized protein OS=Trypanosoma cruzi (strain CL Brener) GN=Tc00.1047053472777.20 PE=4 SV=1
Q4DBS2	2	3	Uncharacterized protein OS=Trypanosoma cruzi (strain CL Brener) GN=Tc00.1047053508625.20 PE=4 SV=1; Additional IDs concatenated into MaxParsimony group: Q4D3T2; Additional IDs concatenated into MaxParsimony group: Q4D3T2
Q4E568	2	3	Paraflagellar rod component, putative OS=Trypanosoma cruzi (strain CL Brener) GN=Tc00.1047053510359.20 PE=4 SV=1; Additional IDs concatenated into MaxParsimony group: Q4DWL5; Additional IDs concatenated into MaxParsimony group: Q4DWL5
Q4CUP7	2	3	Uncharacterized protein OS=Trypanosoma cruzi (strain CL Brener) GN=Tc00.1047053506915.10 PE=4 SV=1; Additional IDs concatenated into MaxParsimony group: Q4DA14; Additional IDs concatenated into MaxParsimony group: Q4DA14
Q4CX12	2	3	Protein transport protein Sec23A, putative OS=Trypanosoma cruzi (strain CL Brener) GN=Tc00.1047053506249.20 PE=4 SV=1; Additional IDs concatenated into MaxParsimony group: Q4DW51; Additional IDs concatenated into MaxParsimony group: Q4DW51
Uniprot ID	Fold Change	pValue	Description
Q4DND1	2.61889	0.0480903	Proteasome subunit beta type OS=Trypanosoma cruzi (strain CL Brener) GN=Tc00.1047053507521.50 PE=3 SV=1; Additional IDs concatenated into MaxParsimony group: Q4DPB7; Additional IDs concatenated into MaxParsimony group: Q4DPB7
Q4E620	2.36499	0.045669	Elongation initiation factor 2 alpha subunit, putative OS=Trypanosoma cruzi (strain CL Brener) GN=Tc00.1047053508153.730 PE=4 SV=1; Additional IDs concatenated into MaxParsimony group: Q4CV69; Additional IDs concatenated into MaxParsimony group: Q4CV69
Q4DC23	1.98207	0.0303206	60S ribosomal protein L17, putative OS=Trypanosoma cruzi (strain CL Brener) GN=Tc00.1047053506213.80 PE=1 SV=1; Additional IDs concatenated into MaxParsimony group: Q4CRX5; Additional IDs concatenated into MaxParsimony group: Q4CRX5
Q4DAW0	1.94185	0.0481121	Proteasome subunit alpha type OS=Trypanosoma cruzi (strain CL Brener) GN=Tc00.1047053504069.53 PE=3 SV=1
Q4D1H4	1.86524	0.0485864	Proteasome subunit alpha type OS=Trypanosoma cruzi (strain CL Brener) GN=Tc00.1047053511145.43 PE=3 SV=1
Q4DSK1	1.83507	0.0317242	Uncharacterized protein OS=Trypanosoma cruzi (strain CL Brener) GN=Tc00.1047053511303.150 PE=4 SV=1
Q4E088	1.79241	0.0114175	40S ribosomal protein S10, putative OS=Trypanosoma cruzi (strain CL Brener) GN=Tc00.1047053506679.140 PE=4 SV=1
Q4CQW2	1.78707	0.0280088	60S ribosomal protein L4, putative OS=Trypanosoma cruzi (strain CL Brener) GN=Tc00.1047053504121.30 PE=1 SV=1; Additional IDs concatenated into MaxParsimony group: Q4CQW1, Q4CY07, Q4CMS3; Additional IDs concatenated into MaxParsimony group: Q4CQW1, Q4CY07, Q4CMS3
Q4DHH6	1.7589	0.0159037	26S protease regulatory subunit, putative OS=Trypanosoma cruzi (strain CL Brener) GN=Tc00.1047053510265.20 PE=3 SV=1; Additional IDs concatenated into MaxParsimony group: Q4D9R1, Q4DTF6, Q4E0K2, Q4DDZ4; Additional IDs concatenated into MaxParsimony group: Q4DTF6, Q4E0K2, Q4D9R1, Q4DDZ4, Q4DW61, Q4DH19, Q4D731
Q4DYA8	1.65197	0.00275862	Histone H2A OS=Trypanosoma cruzi (strain CL Brener) GN=Tc00.1047053511817.180 PE=3 SV=1; Additional IDs concatenated into MaxParsimony group: Q4DYB0, Q4DYB1, Q4CYH8, Q4D6V9, Q4D6W0
Q4DJT8	1.47527	0.00785666	Mevalonate kinase OS=Trypanosoma cruzi (strain CL Brener) GN=Tc00.1047053509237.10 PE=3 SV=1; Additional IDs concatenated into MaxParsimony group: Q4CLD0; Additional IDs concatenated into MaxParsimony group: Q4CLD0
Q4D634	1.38221	0.00453964	Paraflagellar rod protein 3, putative OS=Trypanosoma cruzi (strain CL Brener) GN=Tc00.1047053509617.20 PE=4 SV=1
Q4DFP0	1.37176	0.00154669	NADP-dependent alcohol hydrogenase, putative OS=Trypanosoma cruzi (strain CL Brener) GN=Tc00.1047053504425.60 PE=3 SV=1; Additional IDs concatenated into MaxParsimony group: Q4DEF3; Additional IDs concatenated into MaxParsimony group: Q4DEF3
Q4CNP4	1.34253	0.00512498	2-oxoglutarate dehydrogenase, E2 component, dihydrolipoamide succinyltransferase, putative OS=Trypanosoma cruzi (strain CL Brener) GN=Tc00.1047053503935.20 PE=4 SV=1

## Sheet: SP under-represented
Soluble under-represented proteins
Uniprot ID	Replicate Count	Total Signal	Description
Q4E573	3	26	Uncharacterized protein OS=Trypanosoma cruzi (strain CL Brener) GN=Tc00.1047053506559.550 PE=4 SV=1
Q4E5F2	3	15	Uncharacterized protein OS=Trypanosoma cruzi (strain CL Brener) GN=Tc00.1047053511277.420 PE=4 SV=1
Q4DME1	3	15	Uncharacterized protein OS=Trypanosoma cruzi (strain CL Brener) GN=Tc00.1047053506779.90 PE=4 SV=1; Additional IDs concatenated into MaxParsimony group: Q4DHB3; Additional IDs concatenated into MaxParsimony group: Q4DHB3
Q4DLT4	3	13	Uncharacterized protein OS=Trypanosoma cruzi (strain CL Brener) GN=Tc00.1047053509683.100 PE=4 SV=1; Additional IDs concatenated into MaxParsimony group: Q4D5P6
Q4CMV4	3	13	Uncharacterized protein (Fragment) OS=Trypanosoma cruzi (strain CL Brener) GN=Tc00.1047053503543.20 PE=4 SV=1; Additional IDs concatenated into MaxParsimony group: Q4E0Z3; Additional IDs concatenated into MaxParsimony group: Q4E0Z3
Q4E0M6	3	11	Dispersed gene family protein 1 (DGF-1), putative OS=Trypanosoma cruzi (strain CL Brener) GN=Tc00.1047053510307.330 PE=4 SV=1
Q4DDM3	3	11	Dihydrolipoamide acetyltransferase component of pyruvate dehydrogenase complex OS=Trypanosoma cruzi (strain CL Brener) GN=Tc00.1047053507601.70 PE=3 SV=1
Q4DH02	3	10	Uncharacterized protein OS=Trypanosoma cruzi (strain CL Brener) GN=Tc00.1047053511809.60 PE=4 SV=1
Q4DZL6	3	10	Uncharacterized protein OS=Trypanosoma cruzi (strain CL Brener) GN=Tc00.1047053504147.330 PE=4 SV=1
Q4E611	3	10	Inorganic pyrophosphatase, putative OS=Trypanosoma cruzi (strain CL Brener) GN=Tc00.1047053508153.820 PE=4 SV=1; Additional IDs concatenated into MaxParsimony group: Q4DR95; Additional IDs concatenated into MaxParsimony group: Q4DR95
Q4DTI1	3	10	Uncharacterized protein OS=Trypanosoma cruzi (strain CL Brener) GN=Tc00.1047053508737.30 PE=4 SV=1; Additional IDs concatenated into MaxParsimony group: Q4CMA7; Additional IDs concatenated into MaxParsimony group: Q4CMA7, Q4CU25
Q4CWM0	3	9	Uncharacterized protein OS=Trypanosoma cruzi (strain CL Brener) GN=Tc00.1047053510065.40 PE=4 SV=1
Q4E0R5	3	9	Uncharacterized protein OS=Trypanosoma cruzi (strain CL Brener) GN=Tc00.1047053506297.30 PE=4 SV=1; Additional IDs concatenated into MaxParsimony group: Q4E3N1
Q4D8Z1	3	9	Dihydrolipoamide acetyltransferase component of pyruvate dehydrogenase complex OS=Trypanosoma cruzi (strain CL Brener) GN=Tc00.1047053510351.90 PE=3 SV=1
Q4DBL7	3	9	Uncharacterized protein OS=Trypanosoma cruzi (strain CL Brener) GN=Tc00.1047053509461.90 PE=4 SV=1; Additional IDs concatenated into MaxParsimony group: Q4CVC2
Q4DCK7	3	8	Uncharacterized protein OS=Trypanosoma cruzi (strain CL Brener) GN=Tc00.1047053503909.44 PE=4 SV=1; Additional IDs concatenated into MaxParsimony group: Q4DB06; Additional IDs concatenated into MaxParsimony group: Q4DB06
Q4D2P9	3	8	Structural maintenance of chromosomes protein OS=Trypanosoma cruzi (strain CL Brener) GN=Tc00.1047053507005.60 PE=3 SV=1; Additional IDs concatenated into MaxParsimony group: Q4DUB1; Additional IDs concatenated into MaxParsimony group: Q4DUB1
Q4D828	3	6	3-oxoacyl-(Acyl-carrier protein) reductase, putative OS=Trypanosoma cruzi (strain CL Brener) GN=Tc00.1047053511627.150 PE=4 SV=1; Additional IDs concatenated into MaxParsimony group: Q4DPL5; Additional IDs concatenated into MaxParsimony group: Q4DPL5
Q4D3Z8	3	5	Uncharacterized protein OS=Trypanosoma cruzi (strain CL Brener) GN=Tc00.1047053511865.60 PE=3 SV=1; Additional IDs concatenated into MaxParsimony group: Q4DK65; Additional IDs concatenated into MaxParsimony group: Q4DK65
Q4CUF4	3	5	Small GTP-binding protein Rab7, putative OS=Trypanosoma cruzi (strain CL Brener) GN=Tc00.1047053509573.10 PE=4 SV=1; Additional IDs concatenated into MaxParsimony group: Q4CV37; Additional IDs concatenated into MaxParsimony group: Q4CV37
Q4DRB4	3	4	Uncharacterized protein OS=Trypanosoma cruzi (strain CL Brener) GN=Tc00.1047053509693.170 PE=4 SV=1; Additional IDs concatenated into MaxParsimony group: Q4DG93; Additional IDs concatenated into MaxParsimony group: Q4DG93
Q4DID9	3	4	Uncharacterized protein OS=Trypanosoma cruzi (strain CL Brener) GN=Tc00.1047053506959.50 PE=4 SV=1; Additional IDs concatenated into MaxParsimony group: Q4CWM6; Additional IDs concatenated into MaxParsimony group: Q4CWM6
Q4DTI7	2	14	Uncharacterized protein OS=Trypanosoma cruzi (strain CL Brener) GN=Tc00.1047053507053.180 PE=4 SV=1
Q4DF59	2	13	Uncharacterized protein OS=Trypanosoma cruzi (strain CL Brener) GN=Tc00.1047053507623.30 PE=4 SV=1; Additional IDs concatenated into MaxParsimony group: Q4DMM2
Q4DA54	2	13	Histidyl-tRNA synthetase, putative OS=Trypanosoma cruzi (strain CL Brener) GN=Tc00.1047053507019.40 PE=1 SV=1
Q4DU67	2	13	Uncharacterized protein OS=Trypanosoma cruzi (strain CL Brener) GN=Tc00.1047053511903.290 PE=4 SV=1; Additional IDs concatenated into MaxParsimony group: Q4D4J8
Q4CU87	2	12	Uncharacterized protein OS=Trypanosoma cruzi (strain CL Brener) GN=Tc00.1047053511319.20 PE=4 SV=1; Additional IDs concatenated into MaxParsimony group: Q4DMN4
Q4CQF9	2	11	Hexose transporter, putative OS=Trypanosoma cruzi (strain CL Brener) GN=Tc00.1047053508551.30 PE=3 SV=1; Additional IDs concatenated into MaxParsimony group: Q4DKD0, Q4CQF8, Q4D0V4, Q4CKT5; Additional IDs concatenated into MaxParsimony group: Q4DKD0, Q4CQF8, Q4D0V4, Q4CKT5
Q4DA03	2	11	Uncharacterized protein OS=Trypanosoma cruzi (strain CL Brener) GN=Tc00.1047053506797.120 PE=4 SV=1; Additional IDs concatenated into MaxParsimony group: Q4DY77; Additional IDs concatenated into MaxParsimony group: Q4DY77
Q4DMM2	2	11	Uncharacterized protein OS=Trypanosoma cruzi (strain CL Brener) GN=Tc00.1047053505943.40 PE=4 SV=1
Q4DRT5	2	10	ABC transporter, putative OS=Trypanosoma cruzi (strain CL Brener) GN=Tc00.1047053510943.80 PE=4 SV=1; Additional IDs concatenated into MaxParsimony group: Q4DEI4
Q4CV55	2	10	Dynein heavy chain, putative (Fragment) OS=Trypanosoma cruzi (strain CL Brener) GN=Tc00.1047053509103.39 PE=4 SV=1
Q4E023	2	10	Mitochondrial DNA polymerase beta-PAK, putative OS=Trypanosoma cruzi (strain CL Brener) GN=Tc00.1047053507063.100 PE=4 SV=1; Additional IDs concatenated into MaxParsimony group: Q4D0V9
Q4DGP9	2	10	Calmodulin, putative OS=Trypanosoma cruzi (strain CL Brener) GN=Tc00.1047053506835.60 PE=4 SV=1; Additional IDs concatenated into MaxParsimony group: Q4CVY2; Additional IDs concatenated into MaxParsimony group: Q4CVY2
Q4DRD0	2	9	Uncharacterized protein OS=Trypanosoma cruzi (strain CL Brener) GN=Tc00.1047053506503.160 PE=4 SV=1; Additional IDs concatenated into MaxParsimony group: Q4CVE4; Additional IDs concatenated into MaxParsimony group: Q4CVE4
Q4DW86	2	9	Uncharacterized protein OS=Trypanosoma cruzi (strain CL Brener) GN=Tc00.1047053506989.220 PE=4 SV=1; Additional IDs concatenated into MaxParsimony group: Q4D7U7; Additional IDs concatenated into MaxParsimony group: Q4D7U7
Q4CX84	2	8	Uncharacterized protein OS=Trypanosoma cruzi (strain CL Brener) GN=Tc00.1047053509499.38 PE=4 SV=1; Additional IDs concatenated into MaxParsimony group: Q4CY89; Additional IDs concatenated into MaxParsimony group: Q4CY89
Q4D599	2	8	Pumilio/PUF RNA binding protein 7, putative OS=Trypanosoma cruzi (strain CL Brener) GN=Tc00.1047053511715.100 PE=4 SV=1
Q4DTR0	2	8	Uncharacterized protein OS=Trypanosoma cruzi (strain CL Brener) GN=Tc00.1047053509695.90 PE=4 SV=1
Q4DNX7	2	8	Golgi apparatus membrane protein TVP23 homolog OS=Trypanosoma cruzi (strain CL Brener) GN=Tc00.1047053509099.89 PE=3 SV=1; Additional IDs concatenated into MaxParsimony group: Q4D896; Additional IDs concatenated into MaxParsimony group: Q4D896
Q4CP97	2	7	Uncharacterized protein OS=Trypanosoma cruzi (strain CL Brener) GN=Tc00.1047053424123.20 PE=4 SV=1; Additional IDs concatenated into MaxParsimony group: Q4DZS6; Additional IDs concatenated into MaxParsimony group: Q4DZS6
Q4DG35	2	7	Glycerol-3-phosphate dehydrogenase, putative (Fragment) OS=Trypanosoma cruzi (strain CL Brener) GN=Tc00.1047053508241.10 PE=4 SV=1; Additional IDs concatenated into MaxParsimony group: Q4DC80
Q4E3M8	2	7	Uncharacterized protein OS=Trypanosoma cruzi (strain CL Brener) GN=Tc00.1047053510101.330 PE=4 SV=1
Q4CZK5	2	6	Uncharacterized protein OS=Trypanosoma cruzi (strain CL Brener) GN=Tc00.1047053510299.30 PE=4 SV=1; Additional IDs concatenated into MaxParsimony group: Q4CXB1
Q4CML0	2	6	Uncharacterized protein (Fragment) OS=Trypanosoma cruzi (strain CL Brener) GN=Tc00.1047053507971.29 PE=4 SV=1; Additional IDs concatenated into MaxParsimony group: Q4E2D1
Q4CLW5	2	6	Pumilio/PUF RNA binding protein 7, putative (Fragment) OS=Trypanosoma cruzi (strain CL Brener) GN=Tc00.1047053401469.20 PE=4 SV=1
Q4E0U1	2	6	RNA-binding protein, putative OS=Trypanosoma cruzi (strain CL Brener) GN=Tc00.1047053509965.180 PE=4 SV=1; Additional IDs concatenated into MaxParsimony group: Q4DG02; Additional IDs concatenated into MaxParsimony group: Q4DG02, Q4CXM0
Q4DD93	2	6	Uncharacterized protein OS=Trypanosoma cruzi (strain CL Brener) GN=Tc00.1047053506829.90 PE=4 SV=1; Additional IDs concatenated into MaxParsimony group: Q4CLZ3, Q4CNZ8
Q4DK47	2	6	Membrane-bound acid phosphatase, putative (Fragment) OS=Trypanosoma cruzi (strain CL Brener) GN=Tc00.1047053508827.10 PE=4 SV=1
Q4DH21	2	6	Uncharacterized protein OS=Trypanosoma cruzi (strain CL Brener) GN=Tc00.1047053506251.30 PE=4 SV=1; Additional IDs concatenated into MaxParsimony group: Q4DW59; Additional IDs concatenated into MaxParsimony group: Q4DW59
Q4D640	2	6	ATP-dependent RNA helicase, putative OS=Trypanosoma cruzi (strain CL Brener) GN=Tc00.1047053508141.40 PE=4 SV=1; Additional IDs concatenated into MaxParsimony group: Q4CR83; Additional IDs concatenated into MaxParsimony group: Q4CR83
Q4CY24	2	6	Dolichyl-phosphate beta-D-mannosyltransferase, putative OS=Trypanosoma cruzi (strain CL Brener) GN=Tc00.1047053506581.10 PE=4 SV=1; Additional IDs concatenated into MaxParsimony group: Q4D5W6; Additional IDs concatenated into MaxParsimony group: Q4D5W6
Q4E3B1	2	6	Uncharacterized protein OS=Trypanosoma cruzi (strain CL Brener) GN=Tc00.1047053508355.170 PE=3 SV=1
Q4DRS1	2	5	Uncharacterized protein OS=Trypanosoma cruzi (strain CL Brener) GN=Tc00.1047053506739.10 PE=4 SV=1; Additional IDs concatenated into MaxParsimony group: Q4DEP5; Additional IDs concatenated into MaxParsimony group: Q4DEP5
Q4DMP8	2	5	Uncharacterized protein OS=Trypanosoma cruzi (strain CL Brener) GN=Tc00.1047053508899.40 PE=4 SV=1; Additional IDs concatenated into MaxParsimony group: Q4D9Z3; Additional IDs concatenated into MaxParsimony group: Q4D9Z3
Q4D100	2	5	Aminomethyltransferase OS=Trypanosoma cruzi (strain CL Brener) GN=Tc00.1047053504017.40 PE=3 SV=1; Additional IDs concatenated into MaxParsimony group: Q4CYN6
Q4DVP6	2	5	Chaperone DnaJ protein, putative OS=Trypanosoma cruzi (strain CL Brener) GN=Tc00.1047053510659.210 PE=3 SV=1; Additional IDs concatenated into MaxParsimony group: Q4D7B1
Q4DR39	2	5	Ubiquitin carboxyl-terminal hydrolase OS=Trypanosoma cruzi (strain CL Brener) GN=Tc00.1047053504109.90 PE=3 SV=1
Q4DBQ4	2	5	Uncharacterized protein OS=Trypanosoma cruzi (strain CL Brener) GN=Tc00.1047053508601.60 PE=4 SV=1; Additional IDs concatenated into MaxParsimony group: Q4D7I1; Additional IDs concatenated into MaxParsimony group: Q4D7I1
Q4DZK1	2	5	Transcription modulator/accessory protein, putative OS=Trypanosoma cruzi (strain CL Brener) GN=Tc00.1047053508799.140 PE=4 SV=1; Additional IDs concatenated into MaxParsimony group: Q4DQF6; Additional IDs concatenated into MaxParsimony group: Q4DQF6
Q4DTK1	2	5	Uncharacterized protein OS=Trypanosoma cruzi (strain CL Brener) GN=Tc00.1047053507053.40 PE=4 SV=1
Q4CWM3	2	5	Uncharacterized protein OS=Trypanosoma cruzi (strain CL Brener) GN=Tc00.1047053510065.10 PE=4 SV=1; Additional IDs concatenated into MaxParsimony group: Q4CRK8, Q4CNQ4, Q4CN14, Q4CWM4; Additional IDs concatenated into MaxParsimony group: Q4CN14, Q4CNQ4, Q4CRK8, Q4CNQ5, Q4CWM4
Q4DYM9	2	5	Uncharacterized protein OS=Trypanosoma cruzi (strain CL Brener) GN=Tc00.1047053504427.140 PE=4 SV=1; Additional IDs concatenated into MaxParsimony group: Q4D3V3; Additional IDs concatenated into MaxParsimony group: Q4D3V3
Q4DX44	2	5	Aquaporin 9, putative OS=Trypanosoma cruzi (strain CL Brener) GN=Tc00.1047053508257.140 PE=3 SV=1
Q4CQ55	2	5	Uncharacterized protein OS=Trypanosoma cruzi (strain CL Brener) GN=Tc00.1047053508463.20 PE=4 SV=1
Q4DB98	2	5	Uncharacterized protein OS=Trypanosoma cruzi (strain CL Brener) GN=Tc00.1047053510091.14 PE=4 SV=1; Additional IDs concatenated into MaxParsimony group: Q4DXQ7; Additional IDs concatenated into MaxParsimony group: Q4DXQ7
Q4D7H7	2	5	Threonylcarbamoyl-AMP synthase OS=Trypanosoma cruzi (strain CL Brener) GN=Tc00.1047053511801.50 PE=3 SV=1; Additional IDs concatenated into MaxParsimony group: Q4DBQ8
Q4CMR4	2	4	2-oxoglutarate dehydrogenase subunit, putative (Fragment) OS=Trypanosoma cruzi (strain CL Brener) GN=Tc00.1047053503793.10 PE=4 SV=1
Q4CMQ9	2	4	Uncharacterized protein OS=Trypanosoma cruzi (strain CL Brener) GN=Tc00.1047053404843.20 PE=4 SV=1; Additional IDs concatenated into MaxParsimony group: Q4D6X7; Additional IDs concatenated into MaxParsimony group: Q4D6X7
Q4D757	2	4	Uncharacterized protein OS=Trypanosoma cruzi (strain CL Brener) GN=Tc00.1047053504071.30 PE=4 SV=1
Q4D0J3	2	4	5'-3' exonuclease XNRA, putative (Fragment) OS=Trypanosoma cruzi (strain CL Brener) GN=Tc00.1047053507817.80 PE=4 SV=1
Q4CWX4	2	4	Calmodulin, putative OS=Trypanosoma cruzi (strain CL Brener) GN=Tc00.1047053508731.30 PE=4 SV=1; Additional IDs concatenated into MaxParsimony group: Q4DLT9; Additional IDs concatenated into MaxParsimony group: Q4DLT9
Q4E3Y5	2	4	Uncharacterized protein OS=Trypanosoma cruzi (strain CL Brener) GN=Tc00.1047053511127.380 PE=4 SV=1
Q4D2V5	2	4	Replication factor C, subunit 3, putative OS=Trypanosoma cruzi (strain CL Brener) GN=Tc00.1047053510737.110 PE=4 SV=1; Additional IDs concatenated into MaxParsimony group: Q4DUG6
Q4D0L2	2	4	Uncharacterized protein OS=Trypanosoma cruzi (strain CL Brener) GN=Tc00.1047053506301.60 PE=4 SV=1
Q4DV14	2	4	Uncharacterized protein OS=Trypanosoma cruzi (strain CL Brener) GN=Tc00.1047053506811.20 PE=4 SV=1; Additional IDs concatenated into MaxParsimony group: Q4D0B4; Additional IDs concatenated into MaxParsimony group: Q4D0B4
Q4E0S1	2	4	Amastin, putative OS=Trypanosoma cruzi (strain CL Brener) GN=Tc00.1047053509965.394 PE=4 SV=1; Additional IDs concatenated into MaxParsimony group: Q4CKT7; Additional IDs concatenated into MaxParsimony group: Q4CKT7
Q4DFB7	2	4	Uncharacterized protein OS=Trypanosoma cruzi (strain CL Brener) GN=Tc00.1047053508209.39 PE=4 SV=1; Additional IDs concatenated into MaxParsimony group: Q4D2K3; Additional IDs concatenated into MaxParsimony group: Q4D2K3
Q4DFQ0	2	4	Uncharacterized protein OS=Trypanosoma cruzi (strain CL Brener) GN=Tc00.1047053509911.74 PE=4 SV=1
Q4DQM7	2	4	Uncharacterized protein OS=Trypanosoma cruzi (strain CL Brener) GN=Tc00.1047053509109.100 PE=4 SV=1; Additional IDs concatenated into MaxParsimony group: Q4CMT7; Additional IDs concatenated into MaxParsimony group: Q4CMT7
Q4DWI8	2	4	Uncharacterized protein (Fragment) OS=Trypanosoma cruzi (strain CL Brener) GN=Tc00.1047053506755.279 PE=4 SV=1; Additional IDs concatenated into MaxParsimony group: Q4E542
Q4CSM3	2	4	Uncharacterized protein OS=Trypanosoma cruzi (strain CL Brener) GN=Tc00.1047053509169.30 PE=4 SV=1; Additional IDs concatenated into MaxParsimony group: Q4D0N2; Additional IDs concatenated into MaxParsimony group: Q4D0N2
Q4DXF2	2	3	Uncharacterized protein OS=Trypanosoma cruzi (strain CL Brener) GN=Tc00.1047053508879.40 PE=4 SV=1
Q4DEI2	2	3	Acetyltransferase, putative OS=Trypanosoma cruzi (strain CL Brener) GN=Tc00.1047053504867.40 PE=4 SV=1
Q4DV01	2	3	R27-2 protein, putative OS=Trypanosoma cruzi (strain CL Brener) GN=Tc00.1047053506811.160 PE=4 SV=1
Q4D5X5	2	3	Uncharacterized protein OS=Trypanosoma cruzi (strain CL Brener) GN=Tc00.1047053506167.20 PE=4 SV=1; Additional IDs concatenated into MaxParsimony group: Q4DBG8
Q4DZS7	2	3	Uncharacterized protein OS=Trypanosoma cruzi (strain CL Brener) GN=Tc00.1047053507711.10 PE=4 SV=1
Q4CYE7	2	3	Uncharacterized protein OS=Trypanosoma cruzi (strain CL Brener) GN=Tc00.1047053507629.30 PE=4 SV=1
Q4DEJ9	2	3	Uncharacterized protein OS=Trypanosoma cruzi (strain CL Brener) GN=Tc00.1047053503899.80 PE=4 SV=1
Q4D3B4	2	3	Uncharacterized protein OS=Trypanosoma cruzi (strain CL Brener) GN=Tc00.1047053508413.10 PE=4 SV=1; Additional IDs concatenated into MaxParsimony group: Q4DS93; Additional IDs concatenated into MaxParsimony group: Q4DS93, Q4CNV4
Q4CTD9	2	3	Multidrug resistance protein E, putative (Fragment) OS=Trypanosoma cruzi (strain CL Brener) GN=Tc00.1047053457101.30 PE=4 SV=1; Additional IDs concatenated into MaxParsimony group: Q4CU53; Additional IDs concatenated into MaxParsimony group: Q4CU53
Q4DUF6	2	3	Uncharacterized protein OS=Trypanosoma cruzi (strain CL Brener) GN=Tc00.1047053508837.130 PE=4 SV=1; Additional IDs concatenated into MaxParsimony group: Q4D8I8; Additional IDs concatenated into MaxParsimony group: Q4D8I8
Q4DVD0	2	3	Uncharacterized protein OS=Trypanosoma cruzi (strain CL Brener) GN=Tc00.1047053511217.110 PE=4 SV=1; Additional IDs concatenated into MaxParsimony group: Q4CU59; Additional IDs concatenated into MaxParsimony group: Q4CU59
Q4D787	2	3	Uncharacterized protein OS=Trypanosoma cruzi (strain CL Brener) GN=Tc00.1047053506351.70 PE=4 SV=1; Additional IDs concatenated into MaxParsimony group: Q4D6L0; Additional IDs concatenated into MaxParsimony group: Q4D6L0
Q4CV30	2	3	Uncharacterized protein OS=Trypanosoma cruzi (strain CL Brener) GN=Tc00.1047053509297.20 PE=4 SV=1
Q4DQJ0	2	3	Uncharacterized protein OS=Trypanosoma cruzi (strain CL Brener) GN=Tc00.1047053507723.160 PE=4 SV=1; Additional IDs concatenated into MaxParsimony group: Q4E3F8; Additional IDs concatenated into MaxParsimony group: Q4E3F8
Q4DN47	2	3	UDP-galactose 4-epimerase, putative OS=Trypanosoma cruzi (strain CL Brener) GN=Tc00.1047053506303.50 PE=3 SV=1; Additional IDs concatenated into MaxParsimony group: Q4DUZ8
Q4DSH1	2	3	ABC transporter, putative OS=Trypanosoma cruzi (strain CL Brener) GN=Tc00.1047053507099.80 PE=4 SV=1
Q4CWZ0	2	2	Uncharacterized protein OS=Trypanosoma cruzi (strain CL Brener) GN=Tc00.1047053507057.40 PE=4 SV=1
Q4CRQ2	2	2	DNA-directed RNA polymerase II subunit 2, putative (Fragment) OS=Trypanosoma cruzi (strain CL Brener) GN=Tc00.1047053509951.49 PE=3 SV=1
Q4CZR2	2	2	Splicing factor TSR1, putative OS=Trypanosoma cruzi (strain CL Brener) GN=Tc00.1047053503715.10 PE=4 SV=1; Additional IDs concatenated into MaxParsimony group: Q4DDU0; Additional IDs concatenated into MaxParsimony group: Q4DDU0
Q4E2R4	2	2	Uncharacterized protein OS=Trypanosoma cruzi (strain CL Brener) GN=Tc00.1047053504153.190 PE=4 SV=1
Q4DMC3	2	2	DnaJ chaperone protein, putative OS=Trypanosoma cruzi (strain CL Brener) GN=Tc00.1047053504131.100 PE=4 SV=1
Q4E585	2	2	Uncharacterized protein OS=Trypanosoma cruzi (strain CL Brener) GN=Tc00.1047053506559.440 PE=4 SV=1
Q4CW15	2	2	Uncharacterized protein OS=Trypanosoma cruzi (strain CL Brener) GN=Tc00.1047053504161.20 PE=4 SV=1
Uniprot ID	Fold Change	pValue	Description
Q4DTX6	-4.86302	0.0149965	Ribosomal protein S25, putative OS=Trypanosoma cruzi (strain CL Brener) GN=Tc00.1047053504105.94 PE=4 SV=1
Q4CW02	-2.98656	0.0347408	Calpain-like cysteine peptidase, putative (Fragment) OS=Trypanosoma cruzi (strain CL Brener) GN=Tc00.1047053509013.10 PE=3 SV=1
Q4D139	-2.85421	0.0413069	Calmodulin, putative OS=Trypanosoma cruzi (strain CL Brener) GN=Tc00.1047053507483.30 PE=4 SV=1; Additional IDs concatenated into MaxParsimony group: Q4CSZ2, Q4D137; Additional IDs concatenated into MaxParsimony group: Q4D137, Q4CSZ2
Q4CN13	-2.83817	0.0401941	Retrotransposon hot spot (RHS) protein, putative (Fragment) OS=Trypanosoma cruzi (strain CL Brener) GN=Tc00.1047053510479.11 PE=4 SV=1
Q4CZY9	-2.6737	0.023217	Uncharacterized protein OS=Trypanosoma cruzi (strain CL Brener) GN=Tc00.1047053506481.20 PE=4 SV=1; Additional IDs concatenated into MaxParsimony group: Q4D7R8
Q4DHF8	-2.32788	0.0431748	Aldehyde dehydrogenase, putative (Fragment) OS=Trypanosoma cruzi (strain CL Brener) GN=Tc00.1047053509065.9 PE=3 SV=1; Additional IDs concatenated into MaxParsimony group: Q4DCP7; Additional IDs concatenated into MaxParsimony group: Q4DCP7
Q4D2F2	-2.28977	0.0185753	Isoleucyl-tRNA synthetase, putative OS=Trypanosoma cruzi (strain CL Brener) GN=Tc00.1047053509797.40 PE=3 SV=1; Additional IDs concatenated into MaxParsimony group: Q4DHM0; Additional IDs concatenated into MaxParsimony group: Q4DHM0
Q4D770	-2.24564	0.000105765	Uncharacterized protein OS=Trypanosoma cruzi (strain CL Brener) GN=Tc00.1047053508265.100 PE=4 SV=1
Q4E1R5	-2.15075	0.0467439	Uncharacterized protein OS=Trypanosoma cruzi (strain CL Brener) GN=Tc00.1047053506855.310 PE=4 SV=1
Q4D7V1	-1.97044	0.0365141	Ubiquitin-protein ligase-like, putative OS=Trypanosoma cruzi (strain CL Brener) GN=Tc00.1047053508971.50 PE=4 SV=1
Q4CX46	-1.916	0.00266384	Dynein heavy chain, putative (Fragment) OS=Trypanosoma cruzi (strain CL Brener) GN=Tc00.1047053509585.10 PE=4 SV=1; Additional IDs concatenated into MaxParsimony group: Q4CL73; Additional IDs concatenated into MaxParsimony group: Q4CL73
Q4D6I5	-1.8694	0.00509449	40S ribosomal protein S14, putative OS=Trypanosoma cruzi (strain CL Brener) GN=Tc00.1047053409117.20 PE=3 SV=1
Q4CSI2	-1.81626	0.0112761	Uncharacterized protein OS=Trypanosoma cruzi (strain CL Brener) GN=Tc00.1047053506441.20 PE=4 SV=1
Q4CTD8	-1.81514	0.00668118	Histone H2B OS=Trypanosoma cruzi (strain CL Brener) GN=Tc00.1047053511635.10 PE=3 SV=1; Additional IDs concatenated into MaxParsimony group: Q4CTD7
Q4E644	-1.79794	0.000685264	Uncharacterized protein OS=Trypanosoma cruzi (strain CL Brener) GN=Tc00.1047053508153.460 PE=4 SV=1
Q4DVF8	-1.63674	0.0173588	Uncharacterized protein OS=Trypanosoma cruzi (strain CL Brener) GN=Tc00.1047053506859.180 PE=4 SV=1; Additional IDs concatenated into MaxParsimony group: Q4DVF9, Q4DJ91
Q4DF40	-1.50267	0.0103016	Uncharacterized protein OS=Trypanosoma cruzi (strain CL Brener) GN=Tc00.1047053508177.90 PE=4 SV=1

## Sheet: IP over-represented
Insoluble over-represented proteins
Uniprot ID	Replicate Count	Total Signal	Description
Q4DYI6	3	83	LA RNA binding protein, putative OS=Trypanosoma cruzi (strain CL Brener) GN=Tc00.1047053511367.60 PE=4 SV=1
Q4CNG5	3	41	Calpain-like cysteine peptidase, putative (Fragment) OS=Trypanosoma cruzi (strain CL Brener) GN=Tc00.1047053510801.10 PE=4 SV=1
Q4CL38	3	33	Uncharacterized protein OS=Trypanosoma cruzi (strain CL Brener) GN=Tc00.1047053485683.10 PE=4 SV=1; Additional IDs concatenated into MaxParsimony group: Q4DQQ3; Additional IDs concatenated into MaxParsimony group: Q4DQQ3
Q4E644	3	33	Uncharacterized protein OS=Trypanosoma cruzi (strain CL Brener) GN=Tc00.1047053508153.460 PE=4 SV=1; Additional IDs concatenated into MaxParsimony group: Q4CY57
Q4CVJ1	3	31	Uncharacterized protein OS=Trypanosoma cruzi (strain CL Brener) GN=Tc00.1047053504199.20 PE=4 SV=1; Additional IDs concatenated into MaxParsimony group: Q4DIP8; Additional IDs concatenated into MaxParsimony group: Q4DIP8
Q4D2I4	3	29	ADP-ribosylation factor 3, putative OS=Trypanosoma cruzi (strain CL Brener) GN=Tc00.1047053504433.10 PE=3 SV=1
Q4DRH6	3	29	14-3-3 protein, putative OS=Trypanosoma cruzi (strain CL Brener) GN=Tc00.1047053506775.80 PE=3 SV=1; Additional IDs concatenated into MaxParsimony group: Q4DHC9; Additional IDs concatenated into MaxParsimony group: Q4DHC9
Q4DHE4	3	28	U6 snRNA-associated Sm-like protein LSm5p OS=Trypanosoma cruzi (strain CL Brener) GN=Tc00.1047053509065.124 PE=4 SV=1; Additional IDs concatenated into MaxParsimony group: Q4DCN3
Q4D9J1	3	27	Proteasome regulatory ATPase subunit 1, putative OS=Trypanosoma cruzi (strain CL Brener) GN=Tc00.1047053506857.90 PE=3 SV=1
Q4CY57	3	27	Uncharacterized protein (Fragment) OS=Trypanosoma cruzi (strain CL Brener) GN=Tc00.1047053510317.7 PE=4 SV=1
Q4CVQ4	3	25	60S acidic ribosomal protein P2 beta (H6.4), putative OS=Trypanosoma cruzi (strain CL Brener) GN=Tc00.1047053509165.40 PE=3 SV=1; Additional IDs concatenated into MaxParsimony group: Q4DWU6, Q4DLC3
Q4CTR7	3	23	Malate dehydrogenase OS=Trypanosoma cruzi (strain CL Brener) GN=Tc00.1047053506937.10 PE=3 SV=1; Additional IDs concatenated into MaxParsimony group: Q4D123; Additional IDs concatenated into MaxParsimony group: Q4D123
Q4DNM4	3	23	NADH-cytochrome b5 reductase OS=Trypanosoma cruzi (strain CL Brener) GN=Tc00.1047053506821.210 PE=3 SV=1; Additional IDs concatenated into MaxParsimony group: Q4CM25; Additional IDs concatenated into MaxParsimony group: Q4CM25
Q4D7C9	3	22	40S ribosomal protein S33, putative OS=Trypanosoma cruzi (strain CL Brener) GN=Tc00.1047053511237.50 PE=3 SV=1; Additional IDs concatenated into MaxParsimony group: Q4CXV7, Q4CXV6, Q4D7C8
Q4DQY2	3	20	Uncharacterized protein OS=Trypanosoma cruzi (strain CL Brener) GN=Tc00.1047053509331.74 PE=4 SV=1; Additional IDs concatenated into MaxParsimony group: Q4DYN7; Additional IDs concatenated into MaxParsimony group: Q4DYN7
Q4CZX4	3	20	V-type ATPase, A subunit, putative OS=Trypanosoma cruzi (strain CL Brener) GN=Tc00.1047053503929.10 PE=3 SV=1; Additional IDs concatenated into MaxParsimony group: Q4DED4
Q4DU62	3	19	Glutamamyl carboxypeptidase, putative OS=Trypanosoma cruzi (strain CL Brener) GN=Tc00.1047053511391.120 PE=4 SV=1
Q4CQ95	3	17	Hydrolase, alpha/beta fold family, putative OS=Trypanosoma cruzi (strain CL Brener) GN=Tc00.1047053503399.20 PE=4 SV=1; Additional IDs concatenated into MaxParsimony group: Q4D8H9
Q4E4F4	3	17	Uncharacterized protein OS=Trypanosoma cruzi (strain CL Brener) GN=Tc00.1047053506885.440 PE=3 SV=1; Additional IDs concatenated into MaxParsimony group: Q4CS27
Q4CS07	3	16	Uncharacterized protein OS=Trypanosoma cruzi (strain CL Brener) GN=Tc00.1047053503943.20 PE=4 SV=1; Additional IDs concatenated into MaxParsimony group: Q4CYL6; Additional IDs concatenated into MaxParsimony group: Q4CYL6
Q4DYI5	3	16	Dihydrolipoamide acetyltransferase, putative OS=Trypanosoma cruzi (strain CL Brener) GN=Tc00.1047053511367.70 PE=4 SV=1
Q4DXJ0	3	15	Uncharacterized protein OS=Trypanosoma cruzi (strain CL Brener) GN=Tc00.1047053506941.50 PE=4 SV=1
Q4E4T3	3	15	Protein kinase A catalytic subunit isoform 2, putative OS=Trypanosoma cruzi (strain CL Brener) GN=Tc00.1047053508461.280 PE=3 SV=1; Additional IDs concatenated into MaxParsimony group: Q4E4S9
Q4CZG5	3	14	Ribonucleoprotein p18, mitochondrial, putative OS=Trypanosoma cruzi (strain CL Brener) GN=Tc00.1047053510821.60 PE=4 SV=1
Q4DWC3	3	14	Translation elongation factor 1-beta, putative OS=Trypanosoma cruzi (strain CL Brener) GN=Tc00.1047053509733.100 PE=3 SV=1
Q4DH60	3	13	Pyrroline-5-carboxylate reductase OS=Trypanosoma cruzi (strain CL Brener) GN=Tc00.1047053509207.90 PE=3 SV=1; Additional IDs concatenated into MaxParsimony group: Q4D9J8
Q4DR32	3	13	Electron transfer flavoprotein, putative OS=Trypanosoma cruzi (strain CL Brener) GN=Tc00.1047053504109.160 PE=4 SV=1
Q4CY63	3	13	Uncharacterized protein OS=Trypanosoma cruzi (strain CL Brener) GN=Tc00.1047053509793.20 PE=4 SV=1
Q4DY71	3	12	Cysteine peptidase inhibitor, putative OS=Trypanosoma cruzi (strain CL Brener) GN=Tc00.1047053511907.200 PE=4 SV=1; Additional IDs concatenated into MaxParsimony group: Q4DH32; Additional IDs concatenated into MaxParsimony group: Q4DH32
Q4D8G0	3	12	Uncharacterized protein OS=Trypanosoma cruzi (strain CL Brener) GN=Tc00.1047053508567.40 PE=4 SV=1; Additional IDs concatenated into MaxParsimony group: Q4DKA1
Q4CM92	3	11	Uncharacterized protein OS=Trypanosoma cruzi (strain CL Brener) GN=Tc00.1047053508955.20 PE=4 SV=1; Additional IDs concatenated into MaxParsimony group: Q4CXY8
Q4DPW1	3	11	Retrotransposon hot spot (RHS) protein, putative OS=Trypanosoma cruzi (strain CL Brener) GN=Tc00.1047053509815.10 PE=4 SV=1
Q4DKU9	3	10	Uncharacterized protein OS=Trypanosoma cruzi (strain CL Brener) GN=Tc00.1047053509769.60 PE=4 SV=1
Q4DT77	3	10	Uncharacterized protein OS=Trypanosoma cruzi (strain CL Brener) GN=Tc00.1047053511511.50 PE=4 SV=1
Q4DRJ2	3	10	Ubiquitin-fold modifier 1 OS=Trypanosoma cruzi (strain CL Brener) GN=Tc00.1047053507491.59 PE=3 SV=1; Additional IDs concatenated into MaxParsimony group: Q4D4W4
Q4DHV9	3	10	Nucleolar RNA-binding protein, putative OS=Trypanosoma cruzi (strain CL Brener) GN=Tc00.1047053507649.80 PE=4 SV=1
Q4CWE3	3	10	Uncharacterized protein OS=Trypanosoma cruzi (strain CL Brener) GN=Tc00.1047053509509.50 PE=4 SV=1; Additional IDs concatenated into MaxParsimony group: Q4DVL2; Additional IDs concatenated into MaxParsimony group: Q4DVL2
Q4DKQ2	3	10	Acyl carrier protein OS=Trypanosoma cruzi (strain CL Brener) GN=Tc00.1047053511867.140 PE=3 SV=1
Q4DX43	3	10	Small nuclear ribonucleoprotein SmD3, putative OS=Trypanosoma cruzi (strain CL Brener) GN=Tc00.1047053508257.150 PE=4 SV=1
Q4DCQ3	3	10	Superoxide dismutase OS=Trypanosoma cruzi (strain CL Brener) GN=Tc00.1047053509775.40 PE=1 SV=1; Additional IDs concatenated into MaxParsimony group: Q4D9I5; Additional IDs concatenated into MaxParsimony group: Q4D9I5
Q4DEP6	3	9	NADH-cytochrome b5 reductase, putative (Fragment) OS=Trypanosoma cruzi (strain CL Brener) GN=Tc00.1047053510819.4 PE=4 SV=1
Q4DJN0	3	9	Uncharacterized protein OS=Trypanosoma cruzi (strain CL Brener) GN=Tc00.1047053510609.20 PE=4 SV=1; Additional IDs concatenated into MaxParsimony group: Q4D1P4; Additional IDs concatenated into MaxParsimony group: Q4D1P4
Q4DE00	3	9	Ubiquitin-conjugating enzyme E2, putative OS=Trypanosoma cruzi (strain CL Brener) GN=Tc00.1047053508303.4 PE=3 SV=1
Q4DJ40	3	9	Adenosine 5'-monophosphoramidase, putative OS=Trypanosoma cruzi (strain CL Brener) GN=Tc00.1047053511239.49 PE=4 SV=1; Additional IDs concatenated into MaxParsimony group: Q4DUX5; Additional IDs concatenated into MaxParsimony group: Q4DUX5
Q4DWS4	3	9	Uncharacterized protein OS=Trypanosoma cruzi (strain CL Brener) GN=Tc00.1047053508409.220 PE=4 SV=1
Q4DSP9	3	8	Serine hydroxymethyltransferase OS=Trypanosoma cruzi (strain CL Brener) GN=Tc00.1047053509937.150 PE=3 SV=1; Additional IDs concatenated into MaxParsimony group: Q4D7D8; Additional IDs concatenated into MaxParsimony group: Q4D7D8
Q4DMY8	3	8	Cyclin-dependent kinases regulatory subunit OS=Trypanosoma cruzi (strain CL Brener) GN=Tc00.1047053511529.68 PE=3 SV=1
Q4DG38	3	7	Dynein light chain roadblock OS=Trypanosoma cruzi (strain CL Brener) GN=Tc00.1047053510761.73 PE=3 SV=1
Q4D2M6	3	7	Haloacid dehalogenase-like hydrolase, putative OS=Trypanosoma cruzi (strain CL Brener) GN=Tc00.1047053506931.10 PE=4 SV=1
Q4DMC9	3	7	Ubiquitin-activating enzyme, putative OS=Trypanosoma cruzi (strain CL Brener) GN=Tc00.1047053504131.30 PE=4 SV=1
Q4CW90	3	6	Uncharacterized protein OS=Trypanosoma cruzi (strain CL Brener) GN=Tc00.1047053510593.30 PE=4 SV=1
Q4CPE2	3	6	Biotin/lipoate protein ligase, putative OS=Trypanosoma cruzi (strain CL Brener) GN=Tc00.1047053509749.10 PE=4 SV=1; Additional IDs concatenated into MaxParsimony group: Q4DXV2
Q4DPX8	3	6	NAD(P)-dependent oxidoreductase, putative OS=Trypanosoma cruzi (strain CL Brener) GN=Tc00.1047053507049.60 PE=3 SV=1
Q4DE31	3	6	Fructose-1,6-bisphosphatase, cytosolic, putative OS=Trypanosoma cruzi (strain CL Brener) GN=Tc00.1047053506649.70 PE=3 SV=1; Additional IDs concatenated into MaxParsimony group: Q4CUP1; Additional IDs concatenated into MaxParsimony group: Q4CUP1
Q4DV03	3	6	Uncharacterized protein OS=Trypanosoma cruzi (strain CL Brener) GN=Tc00.1047053506811.140 PE=4 SV=1; Additional IDs concatenated into MaxParsimony group: Q4DN42; Additional IDs concatenated into MaxParsimony group: Q4DN42
Q4DFG3	3	6	Aldehyde dehydrogenase OS=Trypanosoma cruzi (strain CL Brener) GN=Tc00.1047053506155.60 PE=3 SV=1
Q4DCM8	3	6	Small nuclear ribonucleoprotein, putative OS=Trypanosoma cruzi (strain CL Brener) GN=Tc00.1047053510531.54 PE=4 SV=1
Q4DHT2	3	5	Actyltransferase-like, putative OS=Trypanosoma cruzi (strain CL Brener) GN=Tc00.1047053506177.100 PE=4 SV=1; Additional IDs concatenated into MaxParsimony group: Q4DHJ4
Q4CPA6	3	4	Uncharacterized protein OS=Trypanosoma cruzi (strain CL Brener) GN=Tc00.1047053503669.20 PE=4 SV=1; Additional IDs concatenated into MaxParsimony group: Q4D7P1; Additional IDs concatenated into MaxParsimony group: Q4D7P1
Q4CTS6	3	4	Syntaxin, putative OS=Trypanosoma cruzi (strain CL Brener) GN=Tc00.1047053510647.40 PE=4 SV=1; Additional IDs concatenated into MaxParsimony group: Q4D090
Q4DBX3	3	4	Uncharacterized protein OS=Trypanosoma cruzi (strain CL Brener) GN=Tc00.1047053504103.20 PE=4 SV=1
Q4CW02	2	31	Calpain-like cysteine peptidase, putative (Fragment) OS=Trypanosoma cruzi (strain CL Brener) GN=Tc00.1047053509013.10 PE=3 SV=1
Q4DTF6	2	21	26S protease regulatory subunit, putative OS=Trypanosoma cruzi (strain CL Brener) GN=Tc00.1047053510311.70 PE=3 SV=1
Q4D4B8	2	19	60S acidic ribosomal protein P2, putative OS=Trypanosoma cruzi (strain CL Brener) GN=Tc00.1047053510309.50 PE=3 SV=1
Q4DUX4	2	17	Uncharacterized protein OS=Trypanosoma cruzi (strain CL Brener) GN=Tc00.1047053506605.70 PE=4 SV=1
Q4DI03	2	16	Basal body component, putative OS=Trypanosoma cruzi (strain CL Brener) GN=Tc00.1047053511071.130 PE=4 SV=1
Q4DVP6	2	16	Chaperone DnaJ protein, putative OS=Trypanosoma cruzi (strain CL Brener) GN=Tc00.1047053510659.210 PE=3 SV=1; Additional IDs concatenated into MaxParsimony group: Q4D7B1; Additional IDs concatenated into MaxParsimony group: Q4D7B1
Q4DTE8	2	15	MP99, putative OS=Trypanosoma cruzi (strain CL Brener) GN=Tc00.1047053510311.150 PE=4 SV=1; Additional IDs concatenated into MaxParsimony group: Q4E5Y5; Additional IDs concatenated into MaxParsimony group: Q4E5Y5
Q4E5C0	2	15	Uncharacterized protein OS=Trypanosoma cruzi (strain CL Brener) GN=Tc00.1047053506559.70 PE=4 SV=1; Additional IDs concatenated into MaxParsimony group: Q4CNV1
Q4DDT6	2	14	Serine/threonine protein kinase, putative OS=Trypanosoma cruzi (strain CL Brener) GN=Tc00.1047053509607.70 PE=3 SV=1; Additional IDs concatenated into MaxParsimony group: Q4DPG9
Q4DVL1	2	14	Uncharacterized protein OS=Trypanosoma cruzi (strain CL Brener) GN=Tc00.1047053508207.220 PE=4 SV=1; Additional IDs concatenated into MaxParsimony group: Q4CWE4
Q4DWM0	2	14	Uncharacterized protein OS=Trypanosoma cruzi (strain CL Brener) GN=Tc00.1047053507089.240 PE=4 SV=1; Additional IDs concatenated into MaxParsimony group: Q4CWV0
Q4CKH9	2	13	Calpain-like cysteine peptidase, putative (Fragment) OS=Trypanosoma cruzi (strain CL Brener) GN=Tc00.1047053445281.9 PE=4 SV=1
Q4CTC7	2	12	Mitotubule-associated protein Gb4, putative (Fragment) OS=Trypanosoma cruzi (strain CL Brener) GN=Tc00.1047053507569.20 PE=4 SV=1; Additional IDs concatenated into MaxParsimony group: Q4DN34, Q4DSW8, Q4CYL2
Q4DG51	2	12	Long-chain-fatty-acid-CoA ligase protein, putative OS=Trypanosoma cruzi (strain CL Brener) GN=Tc00.1047053511693.100 PE=4 SV=1; Additional IDs concatenated into MaxParsimony group: Q4DCB9; Additional IDs concatenated into MaxParsimony group: Q4DCB9
Q4CME0	2	12	Uncharacterized protein OS=Trypanosoma cruzi (strain CL Brener) GN=Tc00.1047053506461.10 PE=4 SV=1
Q4D8U0	2	11	Uncharacterized protein OS=Trypanosoma cruzi (strain CL Brener) GN=Tc00.1047053507517.50 PE=4 SV=1; Additional IDs concatenated into MaxParsimony group: Q4DDG3
Q4DAS0	2	10	Oxidoreductase, putative OS=Trypanosoma cruzi (strain CL Brener) GN=Tc00.1047053506485.80 PE=4 SV=1
Q4DMS4	2	10	Uncharacterized protein OS=Trypanosoma cruzi (strain CL Brener) GN=Tc00.1047053511545.70 PE=4 SV=1
Q4CZU1	2	10	Uncharacterized protein OS=Trypanosoma cruzi (strain CL Brener) GN=Tc00.1047053509567.50 PE=4 SV=1
Q4D4W9	2	10	Uncharacterized protein OS=Trypanosoma cruzi (strain CL Brener) GN=Tc00.1047053511909.60 PE=4 SV=1; Additional IDs concatenated into MaxParsimony group: Q4D4H3; Additional IDs concatenated into MaxParsimony group: Q4D4H3
Q4DXW9	2	10	Phosphoribosylpyrophosphate synthetase, putative OS=Trypanosoma cruzi (strain CL Brener) GN=Tc00.1047053510431.250 PE=4 SV=1; Additional IDs concatenated into MaxParsimony group: Q4CZI8; Additional IDs concatenated into MaxParsimony group: Q4CZI8
Q4DNF1	2	10	Uncharacterized protein (Fragment) OS=Trypanosoma cruzi (strain CL Brener) GN=Tc00.1047053504827.21 PE=4 SV=1
Q4CUF8	2	10	Uncharacterized protein OS=Trypanosoma cruzi (strain CL Brener) GN=Tc00.1047053509713.30 PE=4 SV=1; Additional IDs concatenated into MaxParsimony group: Q4CSY7
Q4DBW7	2	10	Uncharacterized protein OS=Trypanosoma cruzi (strain CL Brener) GN=Tc00.1047053504103.80 PE=4 SV=1
Q4E4N7	2	9	Dynein light chain, putative OS=Trypanosoma cruzi (strain CL Brener) GN=Tc00.1047053506925.104 PE=4 SV=1
Q4DQ49	2	9	Centrin, putative OS=Trypanosoma cruzi (strain CL Brener) GN=Tc00.1047053508323.60 PE=4 SV=1
Q4DK37	2	9	Splicing factor 3B subunit 1, putative OS=Trypanosoma cruzi (strain CL Brener) GN=Tc00.1047053508827.100 PE=4 SV=1
Q4CXJ1	2	9	Trans-sialidase, putative OS=Trypanosoma cruzi (strain CL Brener) GN=Tc00.1047053509533.10 PE=4 SV=1
Q4DEF3	2	8	NADP-dependent alcohol hydrogenase, putative OS=Trypanosoma cruzi (strain CL Brener) GN=Tc00.1047053508677.80 PE=3 SV=1; Additional IDs concatenated into MaxParsimony group: Q4DFP0, Q4CSB2
Q4DG65	2	8	Isocitrate dehydrogenase [NADP] OS=Trypanosoma cruzi (strain CL Brener) GN=Tc00.1047053511575.60 PE=3 SV=1
Q4DJM6	2	8	Uncharacterized protein OS=Trypanosoma cruzi (strain CL Brener) GN=Tc00.1047053510609.60 PE=4 SV=1; Additional IDs concatenated into MaxParsimony group: Q4CXB6; Additional IDs concatenated into MaxParsimony group: Q4CXB6
Q4D439	2	8	Ubiquitin-conjugating enzyme-like, putative OS=Trypanosoma cruzi (strain CL Brener) GN=Tc00.1047053503999.50 PE=3 SV=1
Q4E620	2	8	Elongation initiation factor 2 alpha subunit, putative OS=Trypanosoma cruzi (strain CL Brener) GN=Tc00.1047053508153.730 PE=4 SV=1; Additional IDs concatenated into MaxParsimony group: Q4CV69; Additional IDs concatenated into MaxParsimony group: Q4CV69
Q4CZP5	2	7	Uncharacterized protein OS=Trypanosoma cruzi (strain CL Brener) GN=Tc00.1047053508507.50 PE=4 SV=1
Q4E4N6	2	7	Uncharacterized protein OS=Trypanosoma cruzi (strain CL Brener) GN=Tc00.1047053506925.110 PE=4 SV=1
Q4DVD0	2	7	Uncharacterized protein OS=Trypanosoma cruzi (strain CL Brener) GN=Tc00.1047053511217.110 PE=4 SV=1; Additional IDs concatenated into MaxParsimony group: Q4CU59
Q4DBC0	2	7	OSM3-like kinesin, putative OS=Trypanosoma cruzi (strain CL Brener) GN=Tc00.1047053509161.30 PE=3 SV=1
Q4D932	2	7	Peptidylprolyl isomerase OS=Trypanosoma cruzi (strain CL Brener) GN=Tc00.1047053508897.110 PE=4 SV=1
Q4E0S1	2	7	Amastin, putative OS=Trypanosoma cruzi (strain CL Brener) GN=Tc00.1047053509965.394 PE=4 SV=1; Additional IDs concatenated into MaxParsimony group: Q4CKT7; Additional IDs concatenated into MaxParsimony group: Q4CKT7
Q4CPE7	2	7	Procyclic form surface glycoprotein, putative OS=Trypanosoma cruzi (strain CL Brener) GN=Tc00.1047053509639.10 PE=4 SV=1; Additional IDs concatenated into MaxParsimony group: Q4CP33, Q4CP32; Additional IDs concatenated into MaxParsimony group: Q4CP33, Q4CP32
Q4DZW6	2	7	Uncharacterized protein OS=Trypanosoma cruzi (strain CL Brener) GN=Tc00.1047053506789.230 PE=4 SV=1
Q4CX08	2	7	40S ribosomal protein S8, putative OS=Trypanosoma cruzi (strain CL Brener) GN=Tc00.1047053506249.60 PE=4 SV=1; Additional IDs concatenated into MaxParsimony group: Q4DW55; Additional IDs concatenated into MaxParsimony group: Q4DW55
Q4DDL0	2	7	Kinesin, putative OS=Trypanosoma cruzi (strain CL Brener) GN=Tc00.1047053511293.50 PE=3 SV=1
Q4D159	2	6	Small nuclear ribonucleoprotein protein, putative OS=Trypanosoma cruzi (strain CL Brener) GN=Tc00.1047053507209.10 PE=4 SV=1
Q4CXB5	2	6	Nuclear receptor binding factor, putative OS=Trypanosoma cruzi (strain CL Brener) GN=Tc00.1047053503617.31 PE=4 SV=1; Additional IDs concatenated into MaxParsimony group: Q4DJM7; Additional IDs concatenated into MaxParsimony group: Q4DJM7
Q4DE55	2	6	Uncharacterized protein OS=Trypanosoma cruzi (strain CL Brener) GN=Tc00.1047053504089.60 PE=4 SV=1; Additional IDs concatenated into MaxParsimony group: Q4CW23; Additional IDs concatenated into MaxParsimony group: Q4CW23
Q4CQB1	2	6	Eukaryotic translation initiation factor 1A, putative (Fragment) OS=Trypanosoma cruzi (strain CL Brener) GN=Tc00.1047053503945.10 PE=4 SV=1
Q4CZP6	2	6	Uncharacterized protein OS=Trypanosoma cruzi (strain CL Brener) GN=Tc00.1047053508507.40 PE=4 SV=1; Additional IDs concatenated into MaxParsimony group: Q4DL38
Q4E653	2	6	Uncharacterized protein OS=Trypanosoma cruzi (strain CL Brener) GN=Tc00.1047053508153.370 PE=3 SV=1; Additional IDs concatenated into MaxParsimony group: Q4CMU5
Q4E128	2	6	Replication factor C, subunit 5, putative OS=Trypanosoma cruzi (strain CL Brener) GN=Tc00.1047053506247.270 PE=4 SV=1
Q4DFR9	2	6	Mitochondrial carrier protein, putative OS=Trypanosoma cruzi (strain CL Brener) GN=Tc00.1047053504125.50 PE=3 SV=1; Additional IDs concatenated into MaxParsimony group: Q4DMB4
Q4CTK7	2	6	Uncharacterized protein OS=Trypanosoma cruzi (strain CL Brener) GN=Tc00.1047053504165.10 PE=4 SV=1
Q4E5A3	2	6	Sarcoplasmic reticulum glycoprotein, putative OS=Trypanosoma cruzi (strain CL Brener) GN=Tc00.1047053506559.270 PE=3 SV=1
Q4DBP9	2	6	Ribose 5-phosphate isomerase, putative OS=Trypanosoma cruzi (strain CL Brener) GN=Tc00.1047053508601.119 PE=4 SV=1; Additional IDs concatenated into MaxParsimony group: Q4CQE2; Additional IDs concatenated into MaxParsimony group: Q4CQE2
Q4DGF4	2	6	RNA-binding protein, putative OS=Trypanosoma cruzi (strain CL Brener) GN=Tc00.1047053509715.23 PE=4 SV=1; Additional IDs concatenated into MaxParsimony group: Q4DZV0; Additional IDs concatenated into MaxParsimony group: Q4DZV0
Q4E3M4	2	6	Uncharacterized protein OS=Trypanosoma cruzi (strain CL Brener) GN=Tc00.1047053510101.380 PE=4 SV=1; Additional IDs concatenated into MaxParsimony group: Q4DFU1
Q4E4P8	2	5	Uncharacterized protein OS=Trypanosoma cruzi (strain CL Brener) GN=Tc00.1047053506925.14 PE=4 SV=1
Q4DZA7	2	5	Uncharacterized protein OS=Trypanosoma cruzi (strain CL Brener) GN=Tc00.1047053504105.60 PE=4 SV=1
Q4DGU4	2	5	Uncharacterized protein OS=Trypanosoma cruzi (strain CL Brener) GN=Tc00.1047053507081.50 PE=4 SV=1
Q4D8U5	2	5	Universal minicircle sequence binding protein (UMSBP), putative OS=Trypanosoma cruzi (strain CL Brener) GN=Tc00.1047053503781.90 PE=4 SV=1; Additional IDs concatenated into MaxParsimony group: Q4D6T8, Q4D6T7, Q4D8U6; Additional IDs concatenated into MaxParsimony group: Q4D6T8, Q4D6T7, Q4D8U6
Q4E1W4	2	5	RNA-binding protein, putative OS=Trypanosoma cruzi (strain CL Brener) GN=Tc00.1047053507993.140 PE=4 SV=1; Additional IDs concatenated into MaxParsimony group: Q4E5D6; Additional IDs concatenated into MaxParsimony group: Q4E5D6
Q4CRZ3	2	5	Ubiquitin hydrolase, putative (Fragment) OS=Trypanosoma cruzi (strain CL Brener) GN=Tc00.1047053506747.30 PE=4 SV=1
Q4D4X1	2	5	Succinate dehydrogenase [ubiquinone] flavoprotein subunit, mitochondrial OS=Trypanosoma cruzi (strain CL Brener) GN=Tc00.1047053511909.40 PE=3 SV=1
Q4CW73	2	5	Uncharacterized protein OS=Trypanosoma cruzi (strain CL Brener) GN=Tc00.1047053507077.50 PE=4 SV=1
Q4DSA0	2	5	Arginase, putative OS=Trypanosoma cruzi (strain CL Brener) GN=Tc00.1047053507031.90 PE=1 SV=1; Additional IDs concatenated into MaxParsimony group: Q4D5Y5; Additional IDs concatenated into MaxParsimony group: Q4D5Y5
Q4E554	2	5	AAA ATPase, putative OS=Trypanosoma cruzi (strain CL Brener) GN=Tc00.1047053510359.170 PE=4 SV=1; Additional IDs concatenated into MaxParsimony group: Q4DWK0; Additional IDs concatenated into MaxParsimony group: Q4DWK0
Q4E4P1	2	5	Epsin, putative OS=Trypanosoma cruzi (strain CL Brener) GN=Tc00.1047053506925.70 PE=4 SV=1
Q4DWI7	2	5	Proteasome regulatory non-ATPase subunit, putative OS=Trypanosoma cruzi (strain CL Brener) GN=Tc00.1047053511725.10 PE=4 SV=1; Additional IDs concatenated into MaxParsimony group: Q4CPL0; Additional IDs concatenated into MaxParsimony group: Q4CPL0
Q4DCB5	2	5	Uncharacterized protein OS=Trypanosoma cruzi (strain CL Brener) GN=Tc00.1047053506933.24 PE=4 SV=1
Q4DUQ2	2	5	GTP-binding protein, putative OS=Trypanosoma cruzi (strain CL Brener) GN=Tc00.1047053504149.110 PE=4 SV=1
Q4DU56	2	4	Pitrilysin-like metalloprotease, putative OS=Trypanosoma cruzi (strain CL Brener) GN=Tc00.1047053511391.200 PE=3 SV=1
Q4DZN9	2	4	Chaperone DnaJ protein, putative OS=Trypanosoma cruzi (strain CL Brener) GN=Tc00.1047053504147.60 PE=4 SV=1
Q4DSA3	2	4	Uncharacterized protein OS=Trypanosoma cruzi (strain CL Brener) GN=Tc00.1047053507031.64 PE=4 SV=1; Additional IDs concatenated into MaxParsimony group: Q4D5Y2; Additional IDs concatenated into MaxParsimony group: Q4D5Y2
Q4D7V1	2	4	Ubiquitin-protein ligase-like, putative OS=Trypanosoma cruzi (strain CL Brener) GN=Tc00.1047053508971.50 PE=4 SV=1
Q4DGX1	2	4	Transcription activator, putative (Fragment) OS=Trypanosoma cruzi (strain CL Brener) GN=Tc00.1047053509213.170 PE=4 SV=1; Additional IDs concatenated into MaxParsimony group: Q4CNC6; Additional IDs concatenated into MaxParsimony group: Q4CNC6
Q4CWB7	2	4	Uncharacterized protein OS=Trypanosoma cruzi (strain CL Brener) GN=Tc00.1047053508981.30 PE=4 SV=1
Q4DV52	2	4	Uncharacterized protein OS=Trypanosoma cruzi (strain CL Brener) GN=Tc00.1047053508647.110 PE=4 SV=1
Q4DEH9	2	4	Cytochrome C oxidase assembly protein, putative OS=Trypanosoma cruzi (strain CL Brener) GN=Tc00.1047053504867.70 PE=4 SV=1
Q4D5U0	2	4	Dynein light chain, putative OS=Trypanosoma cruzi (strain CL Brener) GN=Tc00.1047053503891.120 PE=4 SV=1; Additional IDs concatenated into MaxParsimony group: Q4CU79; Additional IDs concatenated into MaxParsimony group: Q4CU79
Q4DND1	2	4	Proteasome subunit beta type OS=Trypanosoma cruzi (strain CL Brener) GN=Tc00.1047053507521.50 PE=3 SV=1; Additional IDs concatenated into MaxParsimony group: Q4DPB7; Additional IDs concatenated into MaxParsimony group: Q4DPB7
Q4E134	2	4	Uncharacterized protein OS=Trypanosoma cruzi (strain CL Brener) GN=Tc00.1047053506247.210 PE=4 SV=1
Q4DK33	2	4	Coatomer gamma subunit, putative (Fragment) OS=Trypanosoma cruzi (strain CL Brener) GN=Tc00.1047053508827.139 PE=4 SV=1; Additional IDs concatenated into MaxParsimony group: Q4DTP4; Additional IDs concatenated into MaxParsimony group: Q4DTP4
Q4DBF6	2	4	Uncharacterized protein OS=Trypanosoma cruzi (strain CL Brener) GN=Tc00.1047053508973.60 PE=4 SV=1; Additional IDs concatenated into MaxParsimony group: Q4DRF6; Additional IDs concatenated into MaxParsimony group: Q4DRF6
Q4D6R8	2	4	Retrotransposon hot spot (RHS) protein, putative (Fragment) OS=Trypanosoma cruzi (strain CL Brener) GN=Tc00.1047053509581.5 PE=4 SV=1
Q4CSV9	2	4	Glutamine dependent carbamoyl-phosphate synthase, putative (Fragment) OS=Trypanosoma cruzi (strain CL Brener) GN=Tc00.1047053508373.10 PE=4 SV=1
Q4DXI3	2	3	Uncharacterized protein OS=Trypanosoma cruzi (strain CL Brener) GN=Tc00.1047053506941.130 PE=4 SV=1; Additional IDs concatenated into MaxParsimony group: Q4DT70; Additional IDs concatenated into MaxParsimony group: Q4DT70
Q4CZG6	2	3	Replication Factor A 28 kDa subunit, putative OS=Trypanosoma cruzi (strain CL Brener) GN=Tc00.1047053510821.50 PE=4 SV=1
Q4D634	2	3	Paraflagellar rod protein 3, putative OS=Trypanosoma cruzi (strain CL Brener) GN=Tc00.1047053509617.20 PE=4 SV=1
Q4E122	2	3	2,3-bisphosphoglycerate-independent phosphoglycerate mutase, putative OS=Trypanosoma cruzi (strain CL Brener) GN=Tc00.1047053506247.330 PE=4 SV=1
Q4DBH0	2	3	Proteasome endopeptidase complex (Fragment) OS=Trypanosoma cruzi (strain CL Brener) GN=Tc00.1047053506327.10 PE=3 SV=1
Q4D2N2	2	3	Uncharacterized protein OS=Trypanosoma cruzi (strain CL Brener) GN=Tc00.1047053509005.40 PE=4 SV=1; Additional IDs concatenated into MaxParsimony group: Q4CZ86; Additional IDs concatenated into MaxParsimony group: Q4CZ86
Q4CXL4	2	3	Uncharacterized protein OS=Trypanosoma cruzi (strain CL Brener) GN=Tc00.1047053509055.54 PE=4 SV=1; Additional IDs concatenated into MaxParsimony group: Q4E0U7
Q4D0W5	2	3	Uncharacterized protein OS=Trypanosoma cruzi (strain CL Brener) GN=Tc00.1047053503953.10 PE=4 SV=1; Additional IDs concatenated into MaxParsimony group: Q4E017; Additional IDs concatenated into MaxParsimony group: Q4E017
Q4DGL9	2	3	Acetyltransferase, putative OS=Trypanosoma cruzi (strain CL Brener) GN=Tc00.1047053511671.70 PE=4 SV=1
Q4E0A1	2	3	Uncharacterized protein OS=Trypanosoma cruzi (strain CL Brener) GN=Tc00.1047053506679.30 PE=4 SV=1; Additional IDs concatenated into MaxParsimony group: Q4E0A2
Q4CQ07	2	3	Uncharacterized protein OS=Trypanosoma cruzi (strain CL Brener) GN=Tc00.1047053503541.10 PE=4 SV=1; Additional IDs concatenated into MaxParsimony group: Q4E0Y7
Q4DKP5	2	3	Dynein heavy chain, putative (Fragment) OS=Trypanosoma cruzi (strain CL Brener) GN=Tc00.1047053511867.209 PE=4 SV=1
Q4D7R2	2	3	Immunodominant antigen, putative OS=Trypanosoma cruzi (strain CL Brener) GN=Tc00.1047053508865.30 PE=4 SV=1; Additional IDs concatenated into MaxParsimony group: Q4D528; Additional IDs concatenated into MaxParsimony group: Q4D528
Q4CRB6	2	2	Basal body component, putative (Fragment) OS=Trypanosoma cruzi (strain CL Brener) GN=Tc00.1047053511901.10 PE=4 SV=1
Q4DVC2	2	2	Uncharacterized protein OS=Trypanosoma cruzi (strain CL Brener) GN=Tc00.1047053511217.180 PE=4 SV=1
Q4E641	2	2	Peptidyl-prolyl cis-trans isomerase OS=Trypanosoma cruzi (strain CL Brener) GN=Tc00.1047053508153.490 PE=4 SV=1
Q4DX46	2	2	Uncharacterized protein OS=Trypanosoma cruzi (strain CL Brener) GN=Tc00.1047053508257.120 PE=4 SV=1
Q4DSG5	2	2	Transmembrane 9 superfamily member OS=Trypanosoma cruzi (strain CL Brener) GN=Tc00.1047053507099.140 PE=3 SV=1
Q4DXK8	2	2	Uncharacterized protein OS=Trypanosoma cruzi (strain CL Brener) GN=Tc00.1047053506195.180 PE=4 SV=1
Q4DXC0	2	2	Proteasome regulatory non-ATPase subunit 2, putative OS=Trypanosoma cruzi (strain CL Brener) GN=Tc00.1047053510901.150 PE=4 SV=1
Q4DP98	2	2	Phosphoglycerate kinase, putative (Fragment) OS=Trypanosoma cruzi (strain CL Brener) GN=Tc00.1047053506127.9 PE=4 SV=1
Uniprot ID	Fold Change	pValue	Description
Q4E1N5	8.9811	0.00537442	RNA-binding protein, putative OS=Trypanosoma cruzi (strain CL Brener) GN=Tc00.1047053507093.220 PE=4 SV=1; Additional IDs concatenated into MaxParsimony group: Q4E1N4
Q4DMG9	6.64197	0.0023778	Acetyltransferase component of pyruvate dehydrogenase complex OS=Trypanosoma cruzi (strain CL Brener) GN=Tc00.1047053509717.20 PE=3 SV=1
Q4DD39	6.49642	0.00114827	Glucosamine-6-phosphate isomerase OS=Trypanosoma cruzi (strain CL Brener) GN=Tc00.1047053511025.50 PE=3 SV=1; Additional IDs concatenated into MaxParsimony group: Q4D0F2
Q4DZT8	5.93175	0.00274795	Acetyltransferase component of pyruvate dehydrogenase complex OS=Trypanosoma cruzi (strain CL Brener) GN=Tc00.1047053510105.170 PE=3 SV=1
Q4D6H7	4.17937	0.00021122	Ribosomal protein S20, putative OS=Trypanosoma cruzi (strain CL Brener) GN=Tc00.1047053508475.10 PE=3 SV=1
Q4E2I6	3.90456	0.00698954	Succinate--CoA ligase [ADP-forming] subunit alpha, mitochondrial OS=Trypanosoma cruzi (strain CL Brener) GN=Tc00.1047053508479.340 PE=3 SV=1
Q4DMF2	3.73783	0.00271367	Glutathione-S-transferase/glutaredoxin, putative OS=Trypanosoma cruzi (strain CL Brener) GN=Tc00.1047053506443.70 PE=4 SV=1; Additional IDs concatenated into MaxParsimony group: Q4D776
Q4D770	3.59658	0.0149954	Uncharacterized protein OS=Trypanosoma cruzi (strain CL Brener) GN=Tc00.1047053508265.100 PE=4 SV=1
Q4D2F2	3.40825	0.0137102	Isoleucyl-tRNA synthetase, putative OS=Trypanosoma cruzi (strain CL Brener) GN=Tc00.1047053509797.40 PE=3 SV=1; Additional IDs concatenated into MaxParsimony group: Q4DHM0
Q4D4C4	3.32874	0.018001	Glutamyl-tRNA synthetase, putative OS=Trypanosoma cruzi (strain CL Brener) GN=Tc00.1047053506831.70 PE=3 SV=1
Q4DWB5	3.22827	0.0104616	Transitional endoplasmic reticulum ATPase, putative OS=Trypanosoma cruzi (strain CL Brener) GN=Tc00.1047053509733.170 PE=4 SV=1
Q4CPD8	3.20421	2.32569e-05	60S ribosomal protein L29 OS=Trypanosoma cruzi (strain CL Brener) GN=Tc00.1047053509749.33 PE=1 SV=1; Additional IDs concatenated into MaxParsimony group: Q4DXV5; Additional IDs concatenated into MaxParsimony group: Q4DXV5
Q4D4C9	3.18879	0.00892504	3-hydroxy-3-methylglutaryl coenzyme A reductase OS=Trypanosoma cruzi (strain CL Brener) GN=Tc00.1047053506831.40 PE=3 SV=1
Q4DK40	3.13324	2.60964e-05	40S ribosomal protein S17, putative OS=Trypanosoma cruzi (strain CL Brener) GN=Tc00.1047053508827.70 PE=3 SV=1; Additional IDs concatenated into MaxParsimony group: Q4DK39; Additional IDs concatenated into MaxParsimony group: Q4DK39
Q4D7F9	2.97346	0.0215276	Glutamyl-tRNA synthetase, putative OS=Trypanosoma cruzi (strain CL Brener) GN=Tc00.1047053511731.60 PE=3 SV=1; Additional IDs concatenated into MaxParsimony group: Q4D4C4
Q4CNP4	2.92544	0.00185095	2-oxoglutarate dehydrogenase, E2 component, dihydrolipoamide succinyltransferase, putative OS=Trypanosoma cruzi (strain CL Brener) GN=Tc00.1047053503935.20 PE=4 SV=1; Additional IDs concatenated into MaxParsimony group: Q4D1R9; Additional IDs concatenated into MaxParsimony group: Q4D1R9
Q4E024	2.92105	0.0169562	Mitochondrial DNA polymerase beta, putative OS=Trypanosoma cruzi (strain CL Brener) GN=Tc00.1047053507063.90 PE=4 SV=1
Q4DY24	2.8659	0.0224087	Elongation factor TU, putative OS=Trypanosoma cruzi (strain CL Brener) GN=Tc00.1047053506357.40 PE=4 SV=1
Q4CPG3	2.82153	0.00343299	Chaperonin TCP20, putative OS=Trypanosoma cruzi (strain CL Brener) GN=Tc00.1047053509583.10 PE=3 SV=1
Q4CPG4	2.79872	0.0140694	60S ribosomal protein L44, putative (Fragment) OS=Trypanosoma cruzi (strain CL Brener) GN=Tc00.1047053509583.4 PE=3 SV=1; Additional IDs concatenated into MaxParsimony group: Q4CV79
Q4E4R8	2.7151	0.0219171	T-complex protein 1, eta subunit, putative OS=Trypanosoma cruzi (strain CL Brener) GN=Tc00.1047053508461.410 PE=3 SV=1
Q4DH94	2.71489	0.00846611	Mitochondrial DNA polymerase beta, putative OS=Trypanosoma cruzi (strain CL Brener) GN=Tc00.1047053503955.20 PE=4 SV=1; Additional IDs concatenated into MaxParsimony group: Q4E024
Q4E5I8	2.70962	0.0255783	Elongation factor TU, putative OS=Trypanosoma cruzi (strain CL Brener) GN=Tc00.1047053511277.70 PE=4 SV=1; Additional IDs concatenated into MaxParsimony group: Q4DY24
Q4E3Q3	2.68873	0.000721958	60S ribosomal protein L28, putative OS=Trypanosoma cruzi (strain CL Brener) GN=Tc00.1047053510101.40 PE=4 SV=1
Q4DRC3	2.65414	0.00387995	Hypoxanthine-guanine phosphoribosyltransferase, putative OS=Trypanosoma cruzi (strain CL Brener) GN=Tc00.1047053509693.80 PE=4 SV=1; Additional IDs concatenated into MaxParsimony group: Q4DGA2
Q4DQR5	2.64348	0.00165753	3-hydroxy-3-methylglutaryl coenzyme A reductase OS=Trypanosoma cruzi (strain CL Brener) GN=Tc00.1047053509167.20 PE=3 SV=1; Additional IDs concatenated into MaxParsimony group: Q4D4C9
Q4D7Y0	2.61151	0.000845984	60S ribosomal protein L12, putative OS=Trypanosoma cruzi (strain CL Brener) GN=Tc00.1047053510755.129 PE=3 SV=1; Additional IDs concatenated into MaxParsimony group: Q4D3B0, Q4DHZ9, Q4CQ81
Q4DRX6	2.57777	0.00844268	Ribosome assembly factor mrt4 OS=Trypanosoma cruzi (strain CL Brener) GN=Tc00.1047053508307.170 PE=3 SV=1
Q4E3A4	2.52973	0.00662769	60S acidic ribosomal protein P0 OS=Trypanosoma cruzi (strain CL Brener) GN=Tc00.1047053508355.250 PE=3 SV=1; Additional IDs concatenated into MaxParsimony group: Q4E3A3; Additional IDs concatenated into MaxParsimony group: Q4E3A3
Q4D714	2.51593	0.00436419	High mobility group protein, putative OS=Trypanosoma cruzi (strain CL Brener) GN=Tc00.1047053504431.64 PE=4 SV=1; Additional IDs concatenated into MaxParsimony group: Q4DUS7; Additional IDs concatenated into MaxParsimony group: Q4DUS7
Q4CSI2	2.51574	0.0121291	Uncharacterized protein OS=Trypanosoma cruzi (strain CL Brener) GN=Tc00.1047053506441.20 PE=4 SV=1
Q4DFE7	2.50716	0.0157755	GMP reductase OS=Trypanosoma cruzi (strain CL Brener) GN=GMPR PE=3 SV=1; Additional IDs concatenated into MaxParsimony group: Q4E1M2
Q4CP51	2.47253	0.00569561	GTP-binding nuclear protein OS=Trypanosoma cruzi (strain CL Brener) GN=Tc00.1047053503539.30 PE=3 SV=1; Additional IDs concatenated into MaxParsimony group: Q4DIB9; Additional IDs concatenated into MaxParsimony group: Q4DIB9
Q4CVH4	2.36284	0.0043029	Glutamate dehydrogenase, putative (Fragment) OS=Trypanosoma cruzi (strain CL Brener) GN=Tc00.1047053505843.10 PE=4 SV=1
Q4CSN9	2.35699	0.0180358	Casein kinase, putative OS=Trypanosoma cruzi (strain CL Brener) GN=Tc00.1047053507541.40 PE=3 SV=1; Additional IDs concatenated into MaxParsimony group: Q4DN94, Q4CQE5, Q4CN82, Q4DN97, Q4CSP0, Q4DN96, Q4CSN8, Q4CN81
Q4E133	2.33104	0.0211628	Histidine ammonia-lyase OS=Trypanosoma cruzi (strain CL Brener) GN=Tc00.1047053506247.220 PE=3 SV=1; Additional IDs concatenated into MaxParsimony group: Reverse_Q4CPQ0
Q4CY42	2.21732	0.00291195	Uncharacterized protein OS=Trypanosoma cruzi (strain CL Brener) GN=Tc00.1047053504005.54 PE=4 SV=1; Additional IDs concatenated into MaxParsimony group: Q4CQG8; Additional IDs concatenated into MaxParsimony group: Q4CQG8
Q4E4L9	2.18118	0.00551123	Peptidyl-prolyl cis-trans isomerase OS=Trypanosoma cruzi (strain CL Brener) GN=Tc00.1047053506925.300 PE=3 SV=1
Q4E2M9	2.17868	0.0367425	Glucose-6-phosphate isomerase OS=Trypanosoma cruzi (strain CL Brener) GN=Tc00.1047053510889.221 PE=3 SV=1
Q4CTR0	2.16582	0.00818402	Leucyl-tRNA synthetase, putative OS=Trypanosoma cruzi (strain CL Brener) GN=Tc00.1047053511049.40 PE=3 SV=1; Additional IDs concatenated into MaxParsimony group: Q4CL52
Q4D214	2.15602	0.011746	Cytochrome c oxidase subunit V, putative OS=Trypanosoma cruzi (strain CL Brener) GN=Tc00.1047053508503.20 PE=4 SV=1
Q4DC23	2.15036	0.00135864	60S ribosomal protein L17, putative OS=Trypanosoma cruzi (strain CL Brener) GN=Tc00.1047053506213.80 PE=1 SV=1; Additional IDs concatenated into MaxParsimony group: Q4CRX5; Additional IDs concatenated into MaxParsimony group: Q4CRX5, Q4DWM4
Q4DPV7	2.1389	0.0191823	Uncharacterized protein OS=Trypanosoma cruzi (strain CL Brener) GN=Tc00.1047053510877.30 PE=4 SV=1; Additional IDs concatenated into MaxParsimony group: Q4DPV6; Additional IDs concatenated into MaxParsimony group: Q4DPV6
Q4DQZ2	2.07941	0.00712255	Uncharacterized protein OS=Trypanosoma cruzi (strain CL Brener) GN=Tc00.1047053510089.200 PE=4 SV=1; Additional IDs concatenated into MaxParsimony group: Q4DXR1
Q4CYN3	2.04798	0.00305429	Nascent polypeptide-associated complex subunit beta OS=Trypanosoma cruzi (strain CL Brener) GN=Tc00.1047053511231.80 PE=3 SV=1; Additional IDs concatenated into MaxParsimony group: Q4D103
Q4CT37	2.00752	0.02233	2-amino-3-ketobutyrate coenzyme A ligase, putative OS=Trypanosoma cruzi (strain CL Brener) GN=Tc00.1047053511899.40 PE=3 SV=1; Additional IDs concatenated into MaxParsimony group: Q4DI02
Q4D0Y0	1.98646	0.0180095	60S ribosomal subunit protein L31, putative OS=Trypanosoma cruzi (strain CL Brener) GN=Tc00.1047053510663.19 PE=4 SV=1; Additional IDs concatenated into MaxParsimony group: Q4D2V8; Additional IDs concatenated into MaxParsimony group: Q4D2V8
Q4D3T1	1.97283	0.00159885	Elongation factor 2, putative OS=Trypanosoma cruzi (strain CL Brener) GN=Tc00.1047053510963.90 PE=4 SV=1; Additional IDs concatenated into MaxParsimony group: Q4D5X0, Q4D5X1, Q4CNX4
Q4CQE6	1.97097	0.0333167	Casein kinase, putative OS=Trypanosoma cruzi (strain CL Brener) GN=Tc00.1047053507305.20 PE=3 SV=1; Additional IDs concatenated into MaxParsimony group: Q4CN82, Q4CQE5, Q4CSN9, Q4DN97, Q4DN96, Q4CSP0, Q4CSN8, Q4CN81
Q4DIZ9	1.97086	0.00120857	40S ribosomal protein S2, putative OS=Trypanosoma cruzi (strain CL Brener) GN=Tc00.1047053503833.40 PE=3 SV=1
Q4DXR1	1.95581	0.00207879	Uncharacterized protein OS=Trypanosoma cruzi (strain CL Brener) GN=Tc00.1047053510421.210 PE=4 SV=1
Q4DU35	1.92771	0.011064	60S ribosomal protein L32, putative OS=Trypanosoma cruzi (strain CL Brener) GN=Tc00.1047053506241.100 PE=4 SV=1
Q4D9G6	1.89944	0.0109791	Threonyl-tRNA synthetase, putative OS=Trypanosoma cruzi (strain CL Brener) GN=Tc00.1047053508299.80 PE=3 SV=1
Q4CWF4	1.89765	0.000306581	Heat shock 70 kDa protein, putative (Fragment) OS=Trypanosoma cruzi (strain CL Brener) GN=Tc00.1047053503721.39 PE=3 SV=1
Q4CUE7	1.83103	0.00375472	Retrotransposon hot spot (RHS) protein, putative OS=Trypanosoma cruzi (strain CL Brener) GN=Tc00.1047053511371.10 PE=4 SV=1
Q4E3Q5	1.82801	0.0141945	60S ribosomal protein L28, putative OS=Trypanosoma cruzi (strain CL Brener) GN=Tc00.1047053510101.30 PE=4 SV=1; Additional IDs concatenated into MaxParsimony group: Q4E0P2, Q4E3Q3; Additional IDs concatenated into MaxParsimony group: Q4E0P2
Q4CNI8	1.82393	0.0105903	Uncharacterized protein OS=Trypanosoma cruzi (strain CL Brener) GN=Tc00.1047053509139.10 PE=4 SV=1
Q4E3H4	1.78802	0.0154927	Retrotransposon hot spot (RHS) protein, putative OS=Trypanosoma cruzi (strain CL Brener) GN=Tc00.1047053507611.10 PE=4 SV=1
Q4DQ35	1.78755	0.0235733	40S ribosomal protein L14, putative OS=Trypanosoma cruzi (strain CL Brener) GN=Tc00.1047053511825.200 PE=1 SV=1; Additional IDs concatenated into MaxParsimony group: Q4CTR5; Additional IDs concatenated into MaxParsimony group: Q4CTR5
Q4DAZ6	1.77684	0.000166092	Heat shock 70 kDa protein, putative (Fragment) OS=Trypanosoma cruzi (strain CL Brener) GN=Tc00.1047053506135.9 PE=3 SV=1
Q4DST7	1.77634	0.00764742	60S ribosomal protein L32, putative OS=Trypanosoma cruzi (strain CL Brener) GN=Tc00.1047053510769.90 PE=4 SV=1
Q4CQB8	1.77585	0.00636034	Retrotransposon hot spot (RHS) protein, putative OS=Trypanosoma cruzi (strain CL Brener) GN=Tc00.1047053509335.10 PE=4 SV=1
Q4E355	1.7711	0.0127862	Uncharacterized protein OS=Trypanosoma cruzi (strain CL Brener) GN=Tc00.1047053508741.170 PE=4 SV=1
Q4E0I0	1.71524	0.00985491	Retrotransposon hot spot (RHS) protein, putative OS=Trypanosoma cruzi (strain CL Brener) GN=Tc00.1047053508325.160 PE=4 SV=1
Q4DPR0	1.71281	0.0190809	Threonyl-tRNA synthetase, putative OS=Trypanosoma cruzi (strain CL Brener) GN=Tc00.1047053511181.80 PE=3 SV=1
Q4E2Q5	1.708	0.00226796	Uncharacterized protein OS=Trypanosoma cruzi (strain CL Brener) GN=Tc00.1047053504153.280 PE=4 SV=1
Q4CU61	1.69702	0.0113838	60S ribosomal protein L5, putative OS=Trypanosoma cruzi (strain CL Brener) GN=Tc00.1047053509671.80 PE=1 SV=1; Additional IDs concatenated into MaxParsimony group: Q4CU60
Q4CU60	1.65511	0.0157749	60S ribosomal protein L5, putative OS=Trypanosoma cruzi (strain CL Brener) GN=Tc00.1047053510765.70 PE=3 SV=1
Q4DTM8	1.60064	0.0133299	Heat shock protein 70 (HSP70), putative OS=Trypanosoma cruzi (strain CL Brener) GN=Tc00.1047053511211.170 PE=3 SV=1; Additional IDs concatenated into MaxParsimony group: Q4DTM9, Q4CWF4, contaminant_GR78_LYCES, contaminant_GR78_MOUSE, contaminant_GR78_MESAU, contaminant_GR78_RAT, contaminant_GR78_HUMAN; Additional IDs concatenated into MaxParsimony group: Q4DTM9, Q4CU95, contaminant_GR78_MOUSE, co…
Q4CY73	1.57556	0.01406	Histone H2A OS=Trypanosoma cruzi (strain CL Brener) GN=Tc00.1047053511323.40 PE=3 SV=1; Additional IDs concatenated into MaxParsimony group: Q4CZE9, Q4DPI0; Additional IDs concatenated into MaxParsimony group: Q4DPI0, Q4CZE9
Q4CYY4	1.56671	0.0322969	Retrotransposon hot spot (RHS) protein, putative OS=Trypanosoma cruzi (strain CL Brener) GN=Tc00.1047053505373.10 PE=4 SV=1
Q4CSE1	1.55857	0.0140451	Eukaryotic translation initiation factor 5, putative OS=Trypanosoma cruzi (strain CL Brener) GN=Tc00.1047053504119.10 PE=4 SV=1
Q4CRW9	1.55101	0.0181617	Cystathionine beta-synthase OS=Trypanosoma cruzi (strain CL Brener) GN=Tc00.1047053511691.20 PE=4 SV=1
Q4DQ78	1.54987	0.0369187	Retrotransposon hot spot (RHS) protein, putative OS=Trypanosoma cruzi (strain CL Brener) GN=Tc00.1047053510543.90 PE=4 SV=1
Q4CM27	1.50362	0.0357674	U2 splicing auxiliary factor, putative OS=Trypanosoma cruzi (strain CL Brener) GN=Tc00.1047053503577.20 PE=4 SV=1
Q4E5H8	1.46332	0.00205017	Ribosomal protein OS=Trypanosoma cruzi (strain CL Brener) GN=Tc00.1047053511277.160 PE=3 SV=1; Additional IDs concatenated into MaxParsimony group: Q4DB28
Q4DR27	1.46032	0.0118456	Retrotransposon hot spot (RHS) protein, putative OS=Trypanosoma cruzi (strain CL Brener) GN=Tc00.1047053504109.200 PE=4 SV=1
Q4E2W1	1.44758	0.0288453	Cystathionine beta-synthase OS=Trypanosoma cruzi (strain CL Brener) GN=Tc00.1047053508175.360 PE=4 SV=1; Additional IDs concatenated into MaxParsimony group: Q4CYV4, Q4CRX0, Q4DG21, Q4DF37, Q4CXR9, Q4DF38, Q4D172
Q4CUL0	1.42407	0.0260684	40S ribosomal protein S3, putative OS=Trypanosoma cruzi (strain CL Brener) GN=Tc00.1047053430605.29 PE=4 SV=1
Q4CM56	1.36243	0.00189145	Tryparedoxin peroxidase, putative OS=Trypanosoma cruzi (strain CL Brener) GN=Tc00.1047053507259.10 PE=4 SV=1
Q4D2Z9	1.33472	0.00755948	Tryparedoxin peroxidase OS=Trypanosoma cruzi (strain CL Brener) GN=Tc00.1047053504839.44 PE=4 SV=1; Additional IDs concatenated into MaxParsimony group: Q4CVR5, Q4D301

## Sheet: IP under-represented
Insoluble under-represented proteins
Uniprot ID	Replicate Count	Total Signal	Description
Q4DV89	3	23	Uncharacterized protein OS=Trypanosoma cruzi (strain CL Brener) GN=Tc00.1047053509437.70 PE=4 SV=1; Additional IDs concatenated into MaxParsimony group: Q4DTY5; Additional IDs concatenated into MaxParsimony group: Q4DTY5
Q4CZR2	3	14	Splicing factor TSR1, putative OS=Trypanosoma cruzi (strain CL Brener) GN=Tc00.1047053503715.10 PE=4 SV=1; Additional IDs concatenated into MaxParsimony group: Q4DDU0; Additional IDs concatenated into MaxParsimony group: Q4DDU0
Q4E4K5	3	13	Heat shock protein DnaJ, putative OS=Trypanosoma cruzi (strain CL Brener) GN=Tc00.1047053506925.470 PE=4 SV=1
Q4E148	3	13	Uncharacterized protein OS=Trypanosoma cruzi (strain CL Brener) GN=Tc00.1047053506247.74 PE=4 SV=1
Q4DBT8	3	12	Uncharacterized protein OS=Trypanosoma cruzi (strain CL Brener) GN=Tc00.1047053506567.100 PE=4 SV=1; Additional IDs concatenated into MaxParsimony group: Q4DPX4; Additional IDs concatenated into MaxParsimony group: Q4DPX4
Q4DUP6	3	11	Phosphoinositide phospholipase C OS=Trypanosoma cruzi (strain CL Brener) GN=Tc00.1047053504149.160 PE=4 SV=1
Q4DFA9	3	11	Uncharacterized protein OS=Trypanosoma cruzi (strain CL Brener) GN=Tc00.1047053508209.110 PE=4 SV=1; Additional IDs concatenated into MaxParsimony group: Q4D001; Additional IDs concatenated into MaxParsimony group: Q4D001
Q4E1X0	3	10	Protein kinase, putative OS=Trypanosoma cruzi (strain CL Brener) GN=Tc00.1047053507993.80 PE=4 SV=1
Q4DKT4	3	9	Uncharacterized protein OS=Trypanosoma cruzi (strain CL Brener) GN=Tc00.1047053509569.40 PE=4 SV=1; Additional IDs concatenated into MaxParsimony group: Q4D5Q1
Q4DII1	3	8	Uncharacterized protein OS=Trypanosoma cruzi (strain CL Brener) GN=Tc00.1047053506733.10 PE=4 SV=1
Q4DLR0	3	8	Uncharacterized protein OS=Trypanosoma cruzi (strain CL Brener) GN=Tc00.1047053511859.20 PE=4 SV=1; Additional IDs concatenated into MaxParsimony group: Q4DII1
Q4D0I6	3	7	Chaperone DnaJ protein, putative OS=Trypanosoma cruzi (strain CL Brener) GN=Tc00.1047053507389.60 PE=4 SV=1; Additional IDs concatenated into MaxParsimony group: Q4DFP7
Q4DH48	3	6	Uncharacterized protein OS=Trypanosoma cruzi (strain CL Brener) GN=Tc00.1047053507007.40 PE=4 SV=1
Q4CZ76	3	6	Uncharacterized protein (Fragment) OS=Trypanosoma cruzi (strain CL Brener) GN=Tc00.1047053506415.30 PE=4 SV=1
Q4DY99	3	6	Uncharacterized protein OS=Trypanosoma cruzi (strain CL Brener) GN=Tc00.1047053511817.270 PE=4 SV=1; Additional IDs concatenated into MaxParsimony group: Q4CKM2; Additional IDs concatenated into MaxParsimony group: Q4CKM2
Q4D7F6	3	5	Uncharacterized protein OS=Trypanosoma cruzi (strain CL Brener) GN=Tc00.1047053511731.80 PE=4 SV=1; Additional IDs concatenated into MaxParsimony group: Q4D4C7
Q4DA80	3	5	Proline racemase A OS=Trypanosoma cruzi (strain CL Brener) GN=PA45-A PE=1 SV=2; Additional IDs concatenated into MaxParsimony group: Q868H8; Additional IDs concatenated into MaxParsimony group: Q868H8
Q4DDT4	3	4	Uncharacterized protein OS=Trypanosoma cruzi (strain CL Brener) GN=Tc00.1047053509901.110 PE=4 SV=1; Additional IDs concatenated into MaxParsimony group: Q4DPM4; Additional IDs concatenated into MaxParsimony group: Q4DPM4
Q4DWW8	2	19	Uncharacterized protein OS=Trypanosoma cruzi (strain CL Brener) GN=Tc00.1047053510729.160 PE=4 SV=1; Additional IDs concatenated into MaxParsimony group: Q4E4H7
Q4DLY7	2	13	Uncharacterized protein OS=Trypanosoma cruzi (strain CL Brener) GN=Tc00.1047053506753.40 PE=4 SV=1; Additional IDs concatenated into MaxParsimony group: Q4DXG4; Additional IDs concatenated into MaxParsimony group: Q4DXG4
Q4CRM4	2	12	Asparagine synthetase A, putative OS=Trypanosoma cruzi (strain CL Brener) GN=Tc00.1047053503625.10 PE=4 SV=1
Q4D9D2	2	11	Uncharacterized protein OS=Trypanosoma cruzi (strain CL Brener) GN=Tc00.1047053506627.20 PE=4 SV=1
Q4D268	2	11	Kinesin-like protein OS=Trypanosoma cruzi (strain CL Brener) GN=Tc00.1047053506895.40 PE=3 SV=1; Additional IDs concatenated into MaxParsimony group: Q4DGE0, Q4D1U1, Q4DUT7
Q4D4F7	2	10	RNA-binding protein, putative OS=Trypanosoma cruzi (strain CL Brener) GN=Tc00.1047053507037.20 PE=4 SV=1; Additional IDs concatenated into MaxParsimony group: Q4E269; Additional IDs concatenated into MaxParsimony group: Q4E269
Q4CPU1	2	10	ATP-dependent DEAD/H DNA helicase recQ, putative (Fragment) OS=Trypanosoma cruzi (strain CL Brener) GN=Tc00.1047053507433.9 PE=4 SV=1
Q4CVP1	2	9	Uncharacterized protein OS=Trypanosoma cruzi (strain CL Brener) GN=Tc00.1047053509289.30 PE=4 SV=1; Additional IDs concatenated into MaxParsimony group: Q4DDC9; Additional IDs concatenated into MaxParsimony group: Q4DDC9
Q4E4J9	2	9	ABC transporter, putative OS=Trypanosoma cruzi (strain CL Brener) GN=Tc00.1047053506925.530 PE=4 SV=1
Q4E3Q0	2	9	Pretranslocation protein, alpha subunit, putative OS=Trypanosoma cruzi (strain CL Brener) GN=Tc00.1047053510101.70 PE=3 SV=1; Additional IDs concatenated into MaxParsimony group: Q4E0P5
Q4D824	2	9	Dispersed gene family protein 1 (DGF-1), putative (Fragment) OS=Trypanosoma cruzi (strain CL Brener) GN=Tc00.1047053511007.10 PE=4 SV=1
Q4DMJ6	2	9	Uncharacterized protein OS=Trypanosoma cruzi (strain CL Brener) GN=Tc00.1047053508815.80 PE=4 SV=1
Q4DR96	2	9	Peter pan protein, putative OS=Trypanosoma cruzi (strain CL Brener) GN=Tc00.1047053508181.130 PE=4 SV=1; Additional IDs concatenated into MaxParsimony group: Q4E610; Additional IDs concatenated into MaxParsimony group: Q4E610
Q4DDZ0	2	9	Dispersed gene family protein 1 (DGF-1), putative OS=Trypanosoma cruzi (strain CL Brener) GN=Tc00.1047053509529.60 PE=4 SV=1
Q4CR38	2	9	Membrane associated protein, putative (Fragment) OS=Trypanosoma cruzi (strain CL Brener) GN=Tc00.1047053510649.24 PE=3 SV=1; Additional IDs concatenated into MaxParsimony group: Q4D094; Additional IDs concatenated into MaxParsimony group: Q4D094
Q4DYT9	2	9	Dispersed gene family protein 1 (DGF-1), putative OS=Trypanosoma cruzi (strain CL Brener) GN=Tc00.1047053510625.10 PE=4 SV=1
Q4DCT6	2	9	Dispersed gene family protein 1 (DGF-1), putative OS=Trypanosoma cruzi (strain CL Brener) GN=Tc00.1047053507911.30 PE=4 SV=1
Q4DRG8	2	9	NADH-cytochrome B5 reductase, putative OS=Trypanosoma cruzi (strain CL Brener) GN=Tc00.1047053506775.170 PE=4 SV=1; Additional IDs concatenated into MaxParsimony group: Q4DHD7; Additional IDs concatenated into MaxParsimony group: Q4DHD7
Q4D375	2	9	Dispersed gene family protein 1 (DGF-1), putative OS=Trypanosoma cruzi (strain CL Brener) GN=Tc00.1047053507153.30 PE=4 SV=1; Additional IDs concatenated into MaxParsimony group: Q4D276, Q4DCT6, Q4D824, Q4CWM9, Q4CSQ4, Q4CSF7, Q4DE79, Q4DJH8, Q4DWV0, Q4E5K0, Q4E5L0, Q4DBZ8, Q4DDW5, Q4DWA8, Q4DNL7, Q4D2V2, Q4DYT9, Q4DVF3, Q4DKH7, Q4DI74, Q4DAR6, Q4DL66, Q4D6V4, Q4D2A9, Q4DKA8, Q4DQ05, Q4D286, Q4DH…
Q4D1Y0	2	9	Uncharacterized protein OS=Trypanosoma cruzi (strain CL Brener) GN=Tc00.1047053503805.6 PE=4 SV=1; Additional IDs concatenated into MaxParsimony group: Q4DIA5; Additional IDs concatenated into MaxParsimony group: Q4DIA5
Q4D2T2	2	8	Uncharacterized protein OS=Trypanosoma cruzi (strain CL Brener) GN=Tc00.1047053509779.40 PE=4 SV=1; Additional IDs concatenated into MaxParsimony group: Q4D4G1; Additional IDs concatenated into MaxParsimony group: Q4D4G1
Q4DXC5	2	8	DNA topoisomerase OS=Trypanosoma cruzi (strain CL Brener) GN=Tc00.1047053510901.100 PE=3 SV=1
Q4D6V4	2	8	Dispersed gene family protein 1 (DGF-1), putative OS=Trypanosoma cruzi (strain CL Brener) GN=Tc00.1047053510367.10 PE=4 SV=1
Q4DSR1	2	8	Phosphatidyl serine synthase, putative OS=Trypanosoma cruzi (strain CL Brener) GN=Tc00.1047053509937.30 PE=4 SV=1
Q4DVS3	2	8	Dispersed gene family protein 1 (DGF-1), putative (Fragment) OS=Trypanosoma cruzi (strain CL Brener) GN=Tc00.1047053511797.54 PE=4 SV=1
Q4CZK9	2	8	Uncharacterized protein OS=Trypanosoma cruzi (strain CL Brener) GN=Tc00.1047053508711.40 PE=4 SV=1; Additional IDs concatenated into MaxParsimony group: Q4D116; Additional IDs concatenated into MaxParsimony group: Q4D116
Q4DT50	2	7	Uncharacterized protein OS=Trypanosoma cruzi (strain CL Brener) GN=Tc00.1047053511621.160 PE=4 SV=1; Additional IDs concatenated into MaxParsimony group: Q4DTS4; Additional IDs concatenated into MaxParsimony group: Q4DTS4
Q4DKK5	2	7	Carnitine/choline acetyltransferase, putative OS=Trypanosoma cruzi (strain CL Brener) GN=Tc00.1047053509999.90 PE=4 SV=1
Q4DVN0	2	7	Uncharacterized protein OS=Trypanosoma cruzi (strain CL Brener) GN=Tc00.1047053508207.64 PE=4 SV=1; Additional IDs concatenated into MaxParsimony group: Q4DNZ2
Q4CSS4	2	7	Uncharacterized protein (Fragment) OS=Trypanosoma cruzi (strain CL Brener) GN=Tc00.1047053503571.19 PE=4 SV=1; Additional IDs concatenated into MaxParsimony group: Q4DDW4; Additional IDs concatenated into MaxParsimony group: Q4DDW4
Q4CWB2	2	7	Retrotransposon hot spot (RHS) protein, putative (Fragment) OS=Trypanosoma cruzi (strain CL Brener) GN=Tc00.1047053509329.9 PE=4 SV=1
Q4DGL0	2	7	DNAK protein, putative (Fragment) OS=Trypanosoma cruzi (strain CL Brener) GN=Tc00.1047053511257.10 PE=3 SV=1; Additional IDs concatenated into MaxParsimony group: Q4CWK5
Q4DC17	2	6	Dispersed gene family protein 1 (DGF-1), putative OS=Trypanosoma cruzi (strain CL Brener) GN=Tc00.1047053511415.40 PE=4 SV=1
Q4DUR7	2	5	Signal peptide peptidase, putative OS=Trypanosoma cruzi (strain CL Brener) GN=Tc00.1047053507951.260 PE=4 SV=1
Q4D230	2	5	Zinc-binding phosphatase, putative OS=Trypanosoma cruzi (strain CL Brener) GN=Tc00.1047053510635.50 PE=3 SV=1; Additional IDs concatenated into MaxParsimony group: Q4CXS8; Additional IDs concatenated into MaxParsimony group: Q4CXS8
Q4CUH4	2	5	Uncharacterized protein OS=Trypanosoma cruzi (strain CL Brener) GN=Tc00.1047053503833.30 PE=4 SV=1; Additional IDs concatenated into MaxParsimony group: Q4DIZ8
Q4DCG3	2	5	FG-GAP repeat protein, putative OS=Trypanosoma cruzi (strain CL Brener) GN=Tc00.1047053511321.10 PE=4 SV=1; Additional IDs concatenated into MaxParsimony group: Q4D467; Additional IDs concatenated into MaxParsimony group: Q4D467
Q4E0Y1	2	5	Proliferating cell nuclear antigen OS=Trypanosoma cruzi (strain CL Brener) GN=Tc00.1047053508277.150 PE=3 SV=1; Additional IDs concatenated into MaxParsimony group: Q4CQ46
Q4D8C8	2	5	Uncharacterized protein OS=Trypanosoma cruzi (strain CL Brener) GN=Tc00.1047053508411.60 PE=4 SV=1; Additional IDs concatenated into MaxParsimony group: Q4DHR3; Additional IDs concatenated into MaxParsimony group: Q4DHR3
Q4D940	2	5	Signal recognition particle protein, putative OS=Trypanosoma cruzi (strain CL Brener) GN=Tc00.1047053508897.20 PE=4 SV=1
Q4DWR5	2	5	Uncharacterized protein OS=Trypanosoma cruzi (strain CL Brener) GN=Tc00.1047053508409.320 PE=4 SV=1; Additional IDs concatenated into MaxParsimony group: Q4CWC3; Additional IDs concatenated into MaxParsimony group: Q4CWC3
Q4CZB7	2	5	Uncharacterized protein OS=Trypanosoma cruzi (strain CL Brener) GN=Tc00.1047053511559.20 PE=4 SV=1
Q4DMS6	2	5	Uncharacterized protein OS=Trypanosoma cruzi (strain CL Brener) GN=Tc00.1047053511545.50 PE=4 SV=1; Additional IDs concatenated into MaxParsimony group: Q4D601; Additional IDs concatenated into MaxParsimony group: Q4D601
Q4D1U1	2	4	Kinesin-like protein OS=Trypanosoma cruzi (strain CL Brener) GN=Tc00.1047053509589.30 PE=3 SV=1; Additional IDs concatenated into MaxParsimony group: Q4DGE0, Q4DUT7
Q4DAZ3	2	4	Uncharacterized protein OS=Trypanosoma cruzi (strain CL Brener) GN=Tc00.1047053506135.40 PE=4 SV=1; Additional IDs concatenated into MaxParsimony group: Q4CWF7; Additional IDs concatenated into MaxParsimony group: Q4CWF7
Q4DFN9	2	4	Uncharacterized protein OS=Trypanosoma cruzi (strain CL Brener) GN=Tc00.1047053504425.70 PE=4 SV=1; Additional IDs concatenated into MaxParsimony group: Q4DQX1; Additional IDs concatenated into MaxParsimony group: Q4DQX1
Q4CNZ3	2	4	Uncharacterized protein OS=Trypanosoma cruzi (strain CL Brener) GN=Tc00.1047053507769.30 PE=4 SV=1
Q4DIR4	2	4	Ribose-phosphate pyrophosphokinase, putative OS=Trypanosoma cruzi (strain CL Brener) GN=Tc00.1047053511661.90 PE=4 SV=1; Additional IDs concatenated into MaxParsimony group: Q4DSS9; Additional IDs concatenated into MaxParsimony group: Q4DSS9
Q4DZ97	2	4	Importin beta-1 subunit, putative OS=Trypanosoma cruzi (strain CL Brener) GN=Tc00.1047053504105.150 PE=4 SV=1
Q4D651	2	4	Uncharacterized protein OS=Trypanosoma cruzi (strain CL Brener) GN=Tc00.1047053504881.40 PE=4 SV=1; Additional IDs concatenated into MaxParsimony group: Q4CZZ2; Additional IDs concatenated into MaxParsimony group: Q4CZZ2
Q4CPF6	2	4	C-5 sterol desaturase, putative OS=Trypanosoma cruzi (strain CL Brener) GN=Tc00.1047053511339.20 PE=3 SV=1; Additional IDs concatenated into MaxParsimony group: Q4CLX3, Q4CZD7
Q4DBJ7	2	4	Uncharacterized protein OS=Trypanosoma cruzi (strain CL Brener) GN=Tc00.1047053507041.30 PE=4 SV=1; Additional IDs concatenated into MaxParsimony group: Q4DAJ6
Q4DDF0	2	4	Uncharacterized protein OS=Trypanosoma cruzi (strain CL Brener) GN=Tc00.1047053510517.40 PE=4 SV=1; Additional IDs concatenated into MaxParsimony group: Q4D1L8; Additional IDs concatenated into MaxParsimony group: Q4D1L8
Q4DW32	2	3	Pre-mRNA splicing factor ATP-dependent RNA helicase, putative OS=Trypanosoma cruzi (strain CL Brener) GN=Tc00.1047053507681.220 PE=4 SV=1; Additional IDs concatenated into MaxParsimony group: Q4CLW7
Q4CLL8	2	3	Uncharacterized protein OS=Trypanosoma cruzi (strain CL Brener) GN=Tc00.1047053510393.10 PE=4 SV=1; Additional IDs concatenated into MaxParsimony group: Q4DJM3
Q4DIG5	2	3	Uncharacterized protein OS=Trypanosoma cruzi (strain CL Brener) GN=Tc00.1047053511215.20 PE=4 SV=1
Q4DWM1	2	2	Uncharacterized protein OS=Trypanosoma cruzi (strain CL Brener) GN=Tc00.1047053507089.230 PE=4 SV=1
Q4DRV6	2	2	Glycosomal membrane protein, putative OS=Trypanosoma cruzi (strain CL Brener) GN=Tc00.1047053507669.150 PE=4 SV=1; Additional IDs concatenated into MaxParsimony group: Q4CYY9
Q4DWG4	2	2	Uncharacterized protein OS=Trypanosoma cruzi (strain CL Brener) GN=Tc00.1047053511725.280 PE=4 SV=1
Q4CMC1	2	2	Calcium-translocating P-type ATPase, putative (Fragment) OS=Trypanosoma cruzi (strain CL Brener) GN=Tc00.1047053504141.9 PE=4 SV=1
Uniprot ID	Fold Change	pValue	Description
Q4DX81	-3.90733	0.0125605	Cytochrome p450-like protein, putative OS=Trypanosoma cruzi (strain CL Brener) GN=Tc00.1047053506945.190 PE=3 SV=1
Q4E1C6	-3.41788	0.00512756	Uncharacterized protein OS=Trypanosoma cruzi (strain CL Brener) GN=Tc00.1047053511807.190 PE=4 SV=1
Q4CZK6	-3.10267	0.000297365	Uncharacterized protein OS=Trypanosoma cruzi (strain CL Brener) GN=Tc00.1047053510299.20 PE=4 SV=1
Q4DZJ9	-2.93249	0.0288232	Cytochrome b5-like, putative OS=Trypanosoma cruzi (strain CL Brener) GN=Tc00.1047053508799.160 PE=3 SV=1; Additional IDs concatenated into MaxParsimony group: Q4DQF8; Additional IDs concatenated into MaxParsimony group: Q4DQF8
Q4D015	-2.86232	0.00165563	Uncharacterized protein OS=Trypanosoma cruzi (strain CL Brener) GN=Tc00.1047053511803.40 PE=4 SV=1
Q4CXB2	-2.69851	0.000316305	Uncharacterized protein OS=Trypanosoma cruzi (strain CL Brener) GN=Tc00.1047053503527.10 PE=4 SV=1; Additional IDs concatenated into MaxParsimony group: Q4CZK6
Q4DPR6	-2.49658	0.0159574	Uncharacterized protein OS=Trypanosoma cruzi (strain CL Brener) GN=Tc00.1047053511181.20 PE=4 SV=1
Q4DQ60	-2.42931	0.00124339	Ribosomal protein L38, putative OS=Trypanosoma cruzi (strain CL Brener) GN=Tc00.1047053508119.144 PE=1 SV=1; Additional IDs concatenated into MaxParsimony group: Q4CM76, Q4CYB7
Q4DJX1	-2.4094	0.0185143	Ribosomal protein L3, putative OS=Trypanosoma cruzi (strain CL Brener) GN=Tc00.1047053510879.110 PE=3 SV=1; Additional IDs concatenated into MaxParsimony group: Q4D6P8; Additional IDs concatenated into MaxParsimony group: Q4D6P8
Q4D1S6	-2.34389	0.000898167	Membrane-bound acid phosphatase, putative (Fragment) OS=Trypanosoma cruzi (strain CL Brener) GN=Tc00.1047053506025.4 PE=4 SV=1; Additional IDs concatenated into MaxParsimony group: Q4CXR2
Q4D205	-2.34058	0.000334832	Ribosomal protein L38, putative OS=Trypanosoma cruzi (strain CL Brener) GN=Tc00.1047053503575.34 PE=3 SV=1; Additional IDs concatenated into MaxParsimony group: Q4DQ60, Q4CM76, Q4CYB7
Q4DYS0	-2.29715	0.02169	Uncharacterized protein OS=Trypanosoma cruzi (strain CL Brener) GN=Tc00.1047053507641.64 PE=4 SV=1
Q4E657	-2.2505	0.00124989	ATP-dependent 6-phosphofructokinase OS=Trypanosoma cruzi (strain CL Brener) GN=pfk PE=1 SV=1
Q4D1I2	-1.96914	0.0196971	Poly [ADP-ribose] polymerase OS=Trypanosoma cruzi (strain CL Brener) GN=Tc00.1047053509721.60 PE=4 SV=1
Q4D590	-1.94683	0.0214759	Mitochondrial oligo_U binding protein TBRGG1, putative OS=Trypanosoma cruzi (strain CL Brener) GN=Tc00.1047053507927.20 PE=4 SV=1
Q4DEC3	-1.94126	0.0259456	Uncharacterized protein OS=Trypanosoma cruzi (strain CL Brener) GN=Tc00.1047053507715.34 PE=4 SV=1; Additional IDs concatenated into MaxParsimony group: Q4CXN8
Q4DMX4	-1.84101	0.00533534	Uncharacterized protein OS=Trypanosoma cruzi (strain CL Brener) GN=Tc00.1047053511529.210 PE=4 SV=1; Additional IDs concatenated into MaxParsimony group: Q4DAN2; Additional IDs concatenated into MaxParsimony group: Q4DAN2
Q4DFH6	-1.74729	0.0287734	Galactokinase, putative OS=Trypanosoma cruzi (strain CL Brener) GN=Tc00.1047053510667.120 PE=4 SV=1; Additional IDs concatenated into MaxParsimony group: Q4DC09
Q4DCP7	-1.74527	0.0162393	Aldehyde dehydrogenase, putative (Fragment) OS=Trypanosoma cruzi (strain CL Brener) GN=Tc00.1047053506943.4 PE=3 SV=1; Additional IDs concatenated into MaxParsimony group: Q4DHF8; Additional IDs concatenated into MaxParsimony group: Q4DHF8
Q4D6Q5	-1.73052	0.0261183	Uncharacterized protein OS=Trypanosoma cruzi (strain CL Brener) GN=Tc00.1047053511733.100 PE=4 SV=1; Additional IDs concatenated into MaxParsimony group: Q4D4V5
Q4DSE5	-1.69719	0.0341619	Uncharacterized protein OS=Trypanosoma cruzi (strain CL Brener) GN=Tc00.1047053504057.97 PE=4 SV=1
Q4D6Y1	-1.65522	0.010955	Uncharacterized protein OS=Trypanosoma cruzi (strain CL Brener) GN=Tc00.1047053508813.60 PE=4 SV=1
Q4E078	-1.58781	0.0290076	Ribosomal protein L24, putative OS=Trypanosoma cruzi (strain CL Brener) GN=Tc00.1047053503611.20 PE=1 SV=1
Q4D4S1	-1.58523	0.00094663	40S ribosomal protein S9, putative OS=Trypanosoma cruzi (strain CL Brener) GN=Tc00.1047053504163.30 PE=3 SV=1; Additional IDs concatenated into MaxParsimony group: Q4DSJ7; Additional IDs concatenated into MaxParsimony group: Q4DSJ7
Q4DXX8	-1.57305	0.0110111	Nucleolar GTP-binding protein 1 OS=Trypanosoma cruzi (strain CL Brener) GN=Tc00.1047053510431.160 PE=3 SV=1
Q4DZY8	-1.56464	0.0292206	Uncharacterized protein OS=Trypanosoma cruzi (strain CL Brener) GN=Tc00.1047053509805.190 PE=3 SV=1; Additional IDs concatenated into MaxParsimony group: Q4DLL1; Additional IDs concatenated into MaxParsimony group: Q4DLL1
Q4CTX9	-1.52207	0.0278588	Cysteine peptidase, putative (Fragment) OS=Trypanosoma cruzi (strain CL Brener) GN=Tc00.1047053508595.50 PE=3 SV=1
Q4CLI9	-1.499	0.0217357	Retrotransposon hot spot (RHS) protein, putative (Fragment) OS=Trypanosoma cruzi (strain CL Brener) GN=Tc00.1047053506421.10 PE=4 SV=1
Q4DH96	-1.46132	0.00301835	ATP-dependent RNA helicase, putative OS=Trypanosoma cruzi (strain CL Brener) GN=Tc00.1047053511285.120 PE=3 SV=1; Additional IDs concatenated into MaxParsimony group: Q4DC19; Additional IDs concatenated into MaxParsimony group: Q4DC19
Q4CW63	-1.43473	0.0353881	Calpain-like cysteine peptidase, putative OS=Trypanosoma cruzi (strain CL Brener) GN=Tc00.1047053509003.40 PE=4 SV=1
Q4CY21	-1.43467	0.0311821	Eukaryotic translation initiation factor 3 (EIF-3) interacting protein, putative OS=Trypanosoma cruzi (strain CL Brener) GN=Tc00.1047053506581.30 PE=4 SV=1; Additional IDs concatenated into MaxParsimony group: Q4D5W3
Q4DNZ7	-1.41315	0.0173633	60S ribosomal protein L7, putative OS=Trypanosoma cruzi (strain CL Brener) GN=Tc00.1047053507519.110 PE=1 SV=1; Additional IDs concatenated into MaxParsimony group: Q4DVM4, Q4DVM5; Additional IDs concatenated into MaxParsimony group: Q4DVM4, Q4DVM5
