# Supplementary material for: High Throughput Approaches to Unravel the Mechanism of Action of a New Vanadium-Based Compound against Trypanosoma cruzi
Source: Bioinorg Chem Appl. 2020 Apr 11;2020:1634270. doi: 10.1155/2020/1634270 (PMC7171612; doi:10.1155/2020/1634270)
Supplement: Supplementary Materials — Figure S1: validation of transcriptomic data of selected genes with qRT-PCR. The expression of random selected modified transcripts from transcriptome data list was analyzed by qRT-PCR comparing untreated and treated parasites, and expression values (log2 FC RT-PCR) were plotted against transcriptomic data (log2 FC transcriptomic). Figure S2: determination of differentially abundant proteins in T. cruzi epimastigotes treated with VIVO(5Brsal)(aminophen). Soluble (A) and insoluble (B) proteins from untreated (control) and treated parasites were analyzed. The figure shows a Volcano plot generated with the T-Fold module from PatternLab for Proteomics. Proteins detected in at least 4 replicates of all conditions were indicated as individual dots and plotted accordingly to the p value (log2 (p value)) and fold change (log2 (fold change)). Black dots represent proteins that do not satisfy neither the fold change nor the statistics criteria for differential expression and thus are considered unchanged between conditions. Dark gray represents proteins that do satisfy the fold change but not the statistic criteria for differential expression. Light gray dots represent low abundant proteins satisfying both fold change and q value criteria for differential expression but not considered for further analysis due to the low number of spectral counts. Finally, white dots correspond to proteins satisfying all statistical filters and represent the differentially expressed proteins between strains. For details about proteins corresponding to white dots, see supplemental Table S3. Table S1: row data stats from transcriptome analysis of control untreated parasites and VIVO(5Brsal)(aminophen) treated parasites. Table S2: list of differentially expressed genes from transcriptome analysis. The upregulated and downregulated transcripts in VIVO(5Brsal)(aminophen) treated parasites with respect to control untreated parasites are shown. Table S3: list of differentially expressed proteins from [file 1634270.f1.zip › 1634270.f1/S4_File.xlsx]

## Sheet: enrichment.KEGG
Pathway ID	pathway description	observed gene count	false discovery rate	matching proteins in your network (IDs)
Over-represented soluble proteins
3050	Proteasome	4	0.000272	XP_808230.1,XP_811519.1,XP_813823.1,XP_815877.1
Under-represented soluble proteins
No significant enrichment detected
Over-represented insoluble proteins
1100	Metabolic pathways	35	7.3e-12	XP_802803.1,XP_803343.1,XP_803990.1,XP_804871.1,XP_805210.1,XP_805517.1,XP_807670.1,XP_808754.1,XP_809229.1,XP_809232.1,XP_809424.1,XP_810313.1,XP_811811.1,XP_812288.1,XP_812636.1,XP_813108.1,XP_813368.1,XP_813712.1,XP_814961.1,XP_815558.1,XP_815562.1,XP_816420.1,XP_816701.1,XP_817086.1,XP_817254.1,XP_817408.1,XP_817911.1,XP_819244.1,XP_819417.1,XP_819893.1,XP_820336.1,XP_820347.1,XP_820834.1,XP_…
1110	Biosynthesis of secondary metabolites	23	7.67e-12	XP_803343.1,XP_805517.1,XP_809229.1,XP_809232.1,XP_809424.1,XP_810313.1,XP_811811.1,XP_812288.1,XP_812636.1,XP_813108.1,XP_813368.1,XP_813517.1,XP_813712.1,XP_815562.1,XP_816701.1,XP_817408.1,XP_817911.1,XP_819244.1,XP_819417.1,XP_819893.1,XP_820347.1,XP_820834.1,XP_820895.1
3010	Ribosome	17	8.03e-10	XP_803995.1,XP_805668.1,XP_805815.1,XP_806207.1,XP_809223.1,XP_809990.1,XP_810277.1,XP_810490.1,XP_814347.1,XP_814355.1,XP_814693.1,XP_817439.1,XP_817889.1,XP_821117.1,XP_821217.1,XP_821218.1,XP_821884.1
1200	Carbon metabolism	14	1.68e-08	XP_803343.1,XP_805517.1,XP_809424.1,XP_811811.1,XP_812636.1,XP_813368.1,XP_815562.1,XP_817408.1,XP_819244.1,XP_819417.1,XP_819893.1,XP_820347.1,XP_820834.1,XP_820895.1
1120	Microbial metabolism in diverse environments	14	2.22e-07	XP_803343.1,XP_805517.1,XP_811811.1,XP_812636.1,XP_813368.1,XP_815562.1,XP_816787.1,XP_817408.1,XP_819244.1,XP_819417.1,XP_819893.1,XP_820347.1,XP_820834.1,XP_820895.1
20	Citrate cycle (TCA cycle)	8	6.12e-07	XP_803343.1,XP_805517.1,XP_809424.1,XP_813368.1,XP_815562.1,XP_819417.1,XP_819893.1,XP_820834.1
3040	Spliceosome	8	5.74e-06	XP_808107.1,XP_812917.1,XP_813457.1,XP_814744.1,XP_817079.1,XP_817738.1,XP_818947.1,XP_819923.1
1230	Biosynthesis of amino acids	9	3.84e-05	XP_804871.1,XP_811811.1,XP_813368.1,XP_813712.1,XP_817408.1,XP_817911.1,XP_819244.1,XP_820347.1,XP_820988.1
970	Aminoacyl-tRNA biosynthesis	6	0.000109	XP_805515.1,XP_808554.1,XP_809232.1,XP_810313.1,XP_811024.1,XP_816364.1
260	Glycine, serine and threonine metabolism	5	0.000451	XP_804871.1,XP_805293.1,XP_817408.1,XP_820347.1,XP_820988.1
10	Glycolysis / Gluconeogenesis	6	0.00124	XP_812636.1,XP_815562.1,XP_819417.1,XP_819893.1,XP_820347.1,XP_820895.1
3050	Proteasome	5	0.002	XP_813719.1,XP_815877.1,XP_817652.1,XP_818716.1,XP_819028.1
30	Pentose phosphate pathway	4	0.00442	XP_811811.1,XP_812636.1,XP_819244.1,XP_820895.1
860	Porphyrin and chlorophyll metabolism	2	0.0107	XP_809232.1,XP_810313.1
620	Pyruvate metabolism	4	0.0171	XP_805517.1,XP_815562.1,XP_819417.1,XP_819893.1
340	Histidine metabolism	2	0.0326	XP_817254.1,XP_820336.1
190	Oxidative phosphorylation	4	0.0442	XP_807670.1,XP_809424.1,XP_814961.1,XP_817086.1
4141	Protein processing in endoplasmic reticulum	4	0.0442	XP_813054.1,XP_817738.1,XP_818678.1,XP_822107.1
480	Glutathione metabolism	3	0.0491	XP_802803.1,XP_808754.1,XP_813368.1
Under-represented insoluble proteins
3010	Ribosome	6	0.0297	XP_814674.1,XP_816099.1,XP_816521.1,XP_817095.1,XP_820052.1,XP_821266.1
